# Multiple Stressors, Allostasis and Metabolic Scaling in Developing Zebrafish

Ione Hunt von Herbing<sup>1,\*</sup> and Francis T. C. Pan<sup>2</sup>

<sup>1</sup>Department of Biological Sciences, University of North Texas, Denton, Texas 76203-5017, USA

<sup>2</sup>Department of Biological Sciences, University of Southern California, Los Angeles, CA 90089-0371, USA

\*Corresponding author

E-mail: vonherbing@unt.edu

**ORCID ID:**Ione Hunt von Herbing 0000-0003-4335-6878; Francis Pan 0000-0002-1550-4581

## Summary statement

Plasticity of the energetic costs of growth and scaling relationships in larval zebrafish revealed a complex and dynamic allostatic response to multiple environmental stressors in early fish stages.

## ABSTRACT

Deoxygenation and warming affect adult fish physiology in all aquatic ecosystems, but how these stressors impact the energetics of sensitive developing stages is largely unknown.

Addressing this knowledge gap, we investigated chronic and acute effects of two stressors (high-temperature and hypoxia) in yolk-sac larval (48-168 hpf) zebrafish (*Danio rerio*) energy budgets measuring, oxygen consumption rate ( $\dot{M}O_2$ ), growth rate (absolute ( $AGR$ ) & specific ( $SGR$ )), % net conversion efficiency ( $K_N$ ), net cost of growth ( $C_r$ ) and scaling relationships. Embryos and larvae were raised under four chronic treatments, 1) control (28°C &  $pO_2$  21kPa, T28O21), 2) high-temperature (31°C &  $pO_2$  21kPa, T31O21), 3) hypoxia (28°C &  $pO_2$  11kPa, T28TO11), and 4) high-temperature and hypoxia (31°C &  $pO_2$  11kPa, T31O11). From each chronic treatment,

larvae were acutely exposed to the same combinations of stressors for 1h in a respirometer. At hatching, larvae from chronic high-temperature (T31O21 & T31O11) treatments were larger, (higher dry mass ( $M_D$ ) & standard length ( $L_s$ )) than controls (T28O21 & T28O11), but by the end of the yolk-sac stage, increased metabolic demands diverted energy away from growth increasing  $C_r$  and lowering %  $K_N$ . Control metabolic scaling relationships were significant (metabolic exponent  $b$ , log-log slope;  $0.83 \pm 0.68 \pm 95\%$  CI, combined  $b$  of  $1.19 \pm 0.25$ ) and differed from 0.75, but metabolic levels ( $L_a$ ) were lower ( $2.11 \pm 0.90$ ) in acute hypoxia ( $3.35 \pm 1.52$ ) and high-temperature/hypoxia ( $2.61 \pm 1.55$ ). Thus, high-temperature dominated larval energetics acting synergistically with hypoxia increasing cumulative energetic costs and making allostasis difficult compared to older stages.

**Keywords:** embryos, larvae, hypoxia, high-temperature, development plasticity, allostasis.

## INTRODUCTION

A recent report from the Intergovernmental Panel on Climate Change (IPCC) on the ocean and the cryosphere highlighted the alarming increase of deoxygenation, warming, and acidification in aquatic ecosystems (IPCC, 2019). While some aquatic organisms may be able to respond behaviorally to these changes, most will have to physiologically adjust to reach energetic stability through change, a process known as allostasis (Sterling and Eyer, 1988; Sterling 2012). We use allostasis instead of homeostasis because, as Sterling (2012) stated, “the goal of regulation is not to preserve constancy of the internal milieu...but to continually adjust the milieu to promote survival.” Adult and juvenile stages can make allostatic adjustments when exposed to stressors by incurring minimal energetic costs or allostatic loads (McEwen and Wingfield 2003, 2007; Sterling and Eyer, 1988). Embryos and larvae, however, face greater challenges because of inherently higher growth rates, smaller aerobic scopes (Rombough, 1988, 2006) elevated metabolic costs (including transport costs, (Kauffman, 1990)), tight energy budgets and limited food supplies (yolk) (Kamler, 1992; Rombough, 2006). This makes early stages less energetically plastic and more vulnerable to stressors than older stages and more likely to suffer unsustainable cumulative energetic costs or “wear and tear” (Ellis and Del Guidice, 2014).

From past studies we know that fish larval growth rates typically range from 25-30% d<sup>-1</sup> to 100% d<sup>-1</sup> (Kamler, 1992; Wieser, 1994; Conceição et al., 1997; Pedersen, 1997), while juveniles and adults grow at much slower rates ranging from 1-3 % d<sup>-1</sup>. In a suite of studies in the 1980s and 1990s, Wolfgang Wieser and colleagues determined that high larval growth rates were possible because of compensatory energy budgeting in which the limited energy available from yolk is reduced (or traded off) from one physiological function (e.g. metabolic activities) and redirected to another (e.g. growth) (Wieser 1994, Wieser 1989, Rombough 2006; see Pan et al., 2015, 2018, 2021 for metabolic allocation models developed for marine invertebrates). This energetic strategy may provide early stages with the potential to attain novel stable physiological or allostatic states when exposed to stressors (Mauss et al., 2015; McEwen and Wingfield, 2003; Glazier, 2005) and thus improve survival. This strategy differs from that of juveniles and adults in which energy budgets are additive and additional energy needs (e.g. such as those brought on by stressors) can be obtained through processes such as behavioral modification and/or feeding. While balancing the energy budget during any life stage is difficult, acclimation in the face of external stressors becomes even more challenging in early life stages when development (i.e. rates of cellular differentiation) and growth (increases in somatic mass) are rapid, and must occur in concert with maintaining energetic stability, or allostasis.

Multi-stressor experiments are important, because interactions may be additive, synergistic multiplicative or antagonistic, but given the technical difficulties of conducting experiments on the effects of multiple stressors on fish early life stages, most past studies have selected to examine only the effects of a single stressor (e.g. high temperature or oxygen concentration). Only a few studies have investigated the effects of multiple stressors on metabolic rates (Garside, 1966; Hamor and Garside, 1976; Rombough 1994; Conceição et al., 1997) and results were variable ranging from stressors acting in an additive, synergistic, multiplicative or antagonistic manner (see reviews in Crain et al., 2008; Tekin et al., 2020). Therefore, to further understand how multiple stressors act on developing fish larvae we conducted a sister study (Pan and Hunt von Herbing, 2017) to the present one, where we examined the chronic and acute effects of two stressors (temperature and pO<sub>2</sub>) on larval morphological development and metabolic thermal sensitivity (Q<sub>10</sub> values). As in the present study, short-term or acute stress was defined as a transient change in metabolism in response to stressors (Xu et al., 2006; McEwen and Wingfield, 2003) and long-term or chronic stress, was defined as either exposure to multiple or constant

stressors (Santos et al., 2010). Results from Pan and Hunt von Herbing (2017) showed that while development and morphology was minimally impacted, metabolic compensation (a synergistic response) was clearly evident at the yolk-sac larval stage. However, it was unclear what impact these two stressors would have on the energetic costs of acclimation (allostasis) or on metabolic-mass scaling relationships. This present study therefore, investigated both chronic and acute effects of multiple stressors (temperature and  $pO_2$ ) on, % net growth efficiency ( $K_N$ ), net costs of growth ( $C_r$ ) and on metabolic scaling during the earliest period of larval development (e.g. the yolk-sac period) to better determine how physiologically plastic this early stage might be to rapidly changing aquatic environments.

Metabolic-mass scaling relationships are most commonly expressed as those in which body mass ( $M$ ) affects metabolic rate ( $R$ ) according to the power function  $R = aM^b$ , where metabolism and mass are expressed in log-log space,  $R$  is standard ( $R_s$ ) or routine ( $R_r$ ) metabolic rate, ( $a$ ) is the scaling coefficient or mass-independent constant (antilog of the intercept in the linear log-log plot), and ( $b$ ) is the scaling exponent (slope of the log-log plot). While the value of the scaling exponent  $b$  has been actively debated, it is assumed to be fixed at a value of around 0.75 (explained by variation of fractal nutrient transport networks (West et al., 1997)) across all organisms, representing a universal scaling ‘law’ (Hemmingsen 1960; Savage et al., 2004) and underlies the Metabolic Theory of Ecology (MTE) (Gillooly et al., 2001, 2007). However, other studies have shown that the relationship between body mass and metabolic rate can change through ontogeny and does not follow a power function (Moran and Wells, 2007; Kolokotronis et al., 2010; Seymour et al., 2013, White et al., 2022). Further, an alternative to MTE called the ‘metabolic level boundaries hypothesis’ (MLBH hypothesis) was suggested by Glazier (2005, 2008, 2009) in which  $b$  ranged between 0.67 (scaling limited by surface-area limits on the fluxes of resources, wastes and heat) and 1.0 (mass or volume limits on energy use or power production) such that scaling can often vary with changes in ambient temperature (Killen et al., 2010; Tan et al., 2019) and lifestyle (e.g. mobility) or thermoregulatory mode (Glazier, 2010). While  $b$  has received much attention because of its potential predictive power, the scaling coefficient  $a$ , or metabolic level ( $L$ ), have received less as it is considered to be highly variable across taxa (White et al., 2006; Siebel 2007; Glazier 2009) and substantial covariation has been found to exist in  $b$  with elevation ( $a$ ,  $L$ ) (Glazier 2008, 2009, 2010; West and West, 2013). Moreover, most scaling studies have been conducted on juvenile or adult stages because obtaining reliable scaling

relationships under optimal conditions in rapidly developing and growing fish larvae is more difficult. As a result, metabolic scaling exponents ( $b$ ) of early stages while more variable than adults, generally ranged from 0.75 to 1.0 (Giguère et al., 1988; Hunt von Herbing and Boutilier, 1996; Hunt von Herbing, 2006; Kauffman, 1990; Wieser, 1989; Rombough, 1988, 1994; Post and Lee, 1996; Bochdansky and Leggett, 2001). Further, unlike in adults, the scaling coefficient  $a$ , or metabolic level ( $L$ ) and the relationships between scaling variables (e.g. between  $b$  and  $a$  or  $L$ ) remain unexamined. For life stages in which energy budgets are tight such as in fish larvae, examining scaling relationships under stress is therefore valuable because added energetic costs from stressors may contribute to better informed energetic or allostatic models (Glazier, 2005; Finn et al., 1994; Post and Lee, 1996; Glencross, 2008; Killen et al., 2010; Glencross and Bermudas, 2011, 2012).

While allostatic models have helped explain physiological stress responses in mammals (Korte et al., 2007; McEwen and Stellar 1993; McEwen and Wingfield 2003; Sterling, 2012; Sterling and Eyer, 1988), including humans (Ellis and Del Giudice, 2014; Edes and Crews 2016), they only recently gained acceptance for use in adult and juvenile fish stress physiology (Glencross and Bermudas, 2012; Ogoshia et al., 2012; Schreck and Tort 2016; Samaras et al., 2018; Oldham et al., 2019; Leeuwis et al., 2019). The concept of allostasis provides a way to understand how developing embryos and larvae may differentially allocate limited energy from yolk to growth and metabolic activities in response to stressors, but it has not yet been applied to determine how multiple stressors could alter metabolic-mass scaling relationships. We build on our earlier zebrafish (*Danio rerio*) study (Pan and Hunt von Herbing, 2017) in which the unexpected finding that metabolic thermal sensitivity ( $Q_{10}$ ) remained at around 2.2, when larvae were exposed to a 3°C increase in rearing temperature (28 to 31°C). In the present study, we expected zebrafish larvae might be energetically tolerant (exhibit allostasis) to combinations of high temperature (31°C) (which drive metabolic demand) and hypoxia (11pka) (which drive supply (see Rombough, 2006)) because zebrafish in the wild lay demersal eggs in shallow tropical ponds and in slow moving streams where temperatures are likely to be high and O<sub>2</sub> levels low (Spence et al., 2008). Therefore, the major goal was to determine how larvae adjusted their energetic partitioning including the metabolic cost of growth ( $C_r$ ) and % net growth efficiency ( $K_N$ ), when they experienced chronic and acute combinations of high temperature and/or hypoxia. Given the much higher mass-specific daily growth rates and tight energy budgets

generally found in fish yolk-sac larvae (Kamler, 1992), we hypothesized that changes in energetic partitioning ( $C_r$  and  $\%K_N$ ) would depend upon whether these two stressors acted synergistically and/or in an additive manner (see Pan and Hunt von Herbing, 2017). If synergistic or additive, enhanced thermal responses by hypoxia on energetic costs or allostatic loads would result in increased  $C_r$  and decreased  $\%K_N$ , possibly altering scaling relationships between body mass and oxygen consumption rate ( $\dot{M}O_2$ ) because of cumulative energetic costs.

## MATERIALS AND METHODS

### Study Animals

*D. rerio* is especially suited for studies that examine multiple stressors because this species appears to operate close to the upper limit in terms of energy expenditure (Rombough, 2006), produces small larvae (< 200  $\mu$ g total mass at hatch), with one of the highest routine rates of  $\dot{M}O_2$  reported for fish larvae ( $\sim 100$  mol  $O_2$  g<sup>-1</sup> h<sup>-1</sup>; Pelster and Burggren, 1996), and optimally develops at high temperatures between 27° - 29°C. Adult zebrafish (*D. rerio*; 0.6 - 0.9 g) were an outbred stock purchased from local commercial suppliers in Denton, Texas. Before breeding male and female fish were kept separately in a semi-circulating system under a 14 h:10 h light:dark cycle at  $28 \pm 1^\circ\text{C}$  and were fed twice daily with commercial flake food (Tetra, VA) as well as fresh brine shrimp. A total of 13 cohorts over a period of six months obtained from eggs produced by several breeding pairs were used. Embryos from each adult pairing were collected from the bottom of the breeding tanks within 2 hours post-fertilization (hpf) (1-8 cell stage), divided into four groups ( $\sim 200$  eggs each), and transferred to 20-l experimental tanks each containing water pre-equilibrated to one of the four chronic treatments (see Expt. 1 below). Larvae were exposed to the same photoperiod as the adults. After hatching at  $\sim 48$  hpf, larvae relied only on yolk until  $\sim 144$  hpf after which the anus opened, and while exogenous feeding was possible, it was not observed and is usually poor at this early transition stage (Hunt von Herbing et al., 1996). All measurements were conducted in the first week after hatching (48 to 168 hpf).

Two different experiments were conducted: Expt. 1 - Chronic exposure and Expt. 2 - Acute exposure. Both experiments used a  $2 \times 2$  factorial combination of two temperatures: control (28°C) and high temperature (31°C), and two oxygen concentrations: normoxia (21 kPa) and

hypoxia (11 kPa) (Table 1). Expt. 1 was designed to determine effects of chronic exposure to the four treatment conditions on the use of yolk energy for larval production of somatic tissue mass ( $G$ ), routine metabolic rate ( $R_r$ ), % net growth efficiency ( $K_N$ ), mass-specific cost of growth ( $c_r$ ), and the scaling relationships between  $R_r$  and dry mass ( $M_D$ ) over the first week after hatching (48-168 hpf). In Expt. 2, embryos and larvae raised under the four different chronic conditions (see Expt. 1) were further exposed to acute stressors of high-temperature (31° C) and hypoxia (11 kPa) either singly or in combination, to estimate larval metabolic resilience to acute stress following exposure to chronic stress.

### **Expt. 1: Chronic Exposure Treatments - larval energy partitioning and cost of growth**

Embryos were raised at the combinations of temperatures and oxygen concentrations as follows: (1) control temperature - normoxia (T28O21); (2) control temperature-hypoxia (T28O11); (3) high temperature - normoxia (T31O21); and (4) high temperature-hypoxia (T31O11) (Table 1). Chronic treatments were repeated using different cohorts. The selected oxygen concentration of ~ 11 kPa (~50% reduction in oxygen concentration relative to control) is slightly below the critical partial pressure of oxygen ( $pO_2$  at which organismal  $O_2$  consumption becomes limited) for zebrafish embryos (Barrionuevo and Burggren, 1999), and is physiologically stressful during embryonic development. Hypoxia was generated by directly bubbling  $N_2$  into the water and water temperature and  $pO_2$  levels were monitored daily using a hand-held optical dissolved oxygen and temperature meter (Model ProODO, YSI Incorporated, OH). Metabolic rates under chronic conditions were measured at the temperature and  $pO_2$  under the four (see above) larval rearing conditions. A total of 66 measurements were made to investigate effects of chronic exposure on larval metabolic rates during the first week of development. Additionally, a subset of larvae was used to measure larval growth and yolk utilization.

### **Expt. 2: Effects of acute exposure of temperature and $pO_2$ , on post-hatch metabolic-mass dependent rates.**

Embryos were raised (0-48 hpf) until hatching under the specific combinations of temperature and hypoxia listed in Expt. 1 (i.e. T28O21, T31O21, T28O11, T31O11). Rates of oxygen consumption (routine metabolic rate,  $R_r$ ) were first measured at the embryonic rearing



conditions and then larvae were exposed to acute changes in temperature and  $pO_2$  (either singly or in combination) in a respirometer to evaluate the effects of added acute stressors on larval metabolic rates. For each acute measurement, larvae from one of the four chronic conditions (T28O21, T31O21, T28O11 and T31O11) were transferred to respirometry chambers in which water was first equilibrated to the combinations of temperature and  $pO_2$  different from the chronic conditions, and larvae were exposed to these acute conditions, for one hour after initiation during which a series of measurements were taken (see respirometry section for details). As there were a high number of combinations of chronic and acute exposure treatments (four chronic treatment, each measured at two temperatures and two  $pO_2$  levels),  $\dot{M}O_2$  under different environmental conditions was measured at different times throughout the first week of development (48 - 168 hpf). In total, 174 measurements were made to investigate effects of chronic versus acute exposure on larval metabolic rates. For the calculation of energetic budgets, measurements of oxygen consumption rates at different developmental time points were pooled for each chronic treatment group.

### **Effects of chronic high-temperature and hypoxia on growth and yolk-sac utilization**

To determine the effects of chronic exposure on the use of yolk energy between growth ( $G$ ) and metabolism ( $R_r$ ), larvae ( $n = 7 - 10$ ) were sampled for changes in size every 24 h from 48 hpf to 168 hpf and preserved in 10% buffered formalin. Determination of the changes in growth and yolk-sac utilization included measurement of the following variables; dry mass ( $M_D$ ), standard length ( $L_S$ , measured from the tip of the snout to the posterior end of the last vertebra), surface area of the yolk-sac ( $Y_A$ , as measured by the largest optical section across the yolk), Images were recorded for each preserved larva from the left side of the body using a Zeiss Axis Observer inverted microscope (model: Axio Observer.Z1, Carl Zeiss, Oberkochen, Germany) equipped with an AxioCam HRm digital camera mounted on the microscope. All measurements were made on calibrated images using AxioVision Software (Version 4.8.2, Carl Zeiss, Germany).  $M_D$  was determined to the nearest 0.01 mg using a Cahn microbalance (precision  $\pm 0.1$  g) (Thermo Electron Corp., MA), after drying larvae at 65°C overnight in a drying oven. In addition to the samples ( $n = 7 - 10$  at each time point) collected for the morphometric measurements,  $M_D$  measurements were also made on larvae used in respirometry, and those measurements were included in the analyses.



## Estimating energy budgets, % net growth efficiency ( $K_N$ ) and mass-specific routine cost of growth ( $C_r$ )

For developing fish, energy obtained from the absorbed yolk ( $C_y$ ) by the endogenous feeding larva provides materials for the production of growing tissues ( $G$ ) and for routine metabolism ( $R_r$ ) (Kamler, 1992). As no feces are produced prior to the initiation of exogenous feeding only metabolites ( $U$ ) are excreted, and the energy consumed from yolk ( $C_y$ ) can be expressed in the bioenergetic model:

$$C_y = G + R_r + U \text{ (modified from Kamler 1992, Wieser 1994) (Eqn. 1).}$$

The mean efficiency of assimilated energy utilization for growth (% net conversion efficiency) ( $K_N$ , Eqn. 2) and mean cost of growth ( $C_r$ , Eqn. 3) for each chronic treatment combination was calculated for zebrafish yolk-sac larvae (48-169 hpf) from the energy equivalent of total mass produced ( $G$ ) and total metabolism as measured by oxygen consumed ( $R_r$ ) (see Eqn. 1) at routine activity. Estimates of  $G$  (the total  $M_D$  accumulated for each treatment), was multiplied by the caloric density of  $22 \text{ J (g dry mass)}^{-1}$  (Wieser, 1994). For  $R_r$ , the values of oxygen consumed were multiplied by the oxycaloric equivalent of  $1 \text{ mol O}_2 = 0.45 \text{ J}$  and %  $K_N$  was calculated as follows:

$$\% K_N = (G / C_y) = [(G / G + R_r)] \times 100 \text{ (modified from Kamler, 1992) (Eqn. 2)}$$

$U$  (see Eqn. 1) is minimal for the period between hatching (48 hpf) to one day after the digestive tract completely opened (168 hpf) in *D. rerio* and not a factor in %  $K_N$ . As partitioning of metabolizable energy in rapidly growing yolk-sac larvae are distinguished not just by the term  $G$  (Kamler 2007), but also by the net mass-specific cost of growth ( $C$ ), we estimated the specific growth fraction ( $C_r$ ) at the routine metabolic rate of  $R_r$ ,

$$R_t = R_r + C_r (G) \quad \text{(after Wieser, 1994) (Eqn. 3)}$$

where  $R_t$  is total metabolic expenditures. Note that we used  $R_r$  defined as metabolic rates at lowest routine activity (Fry, 1947) because accurately measuring standard metabolism ( $R_s$ ) is difficult in fish larvae, and routine metabolic rate or  $R_r$  is considered the better estimate of freely roaming animals which would result in better estimates of daily (average) energy expenditure (Nagy 1987, 2005; Norin and Gamperl, 2017). In addition, the amount of energy from yolk remaining was estimated based on  $C_y$  and the energy equivalence subtracted from total routine metabolic rate to account for any possible, while tiny, SDA effects. The amount of energy from yolk after hatching directed to  $M_D$  was calculated as the proportion of energy equivalent of the

tissue formed ( $P$ ) (using the caloric density of  $0.022 \text{ J } \mu\text{g } M_D^{-1}$ , Kamler, 1992) of the total energy ( $P + R_r$ ), where  $R$  in Joules was calculated from the oxycaloric equivalent of  $0.45 \text{ J} = 1 \mu\text{mol O}_2$ .

Estimation of absolute and specific growth rates ( $AGR$ ,  $SGR$ ) were based on plots of dry mass versus time (hpf) and curve fitted for an exponential rise to maximum:

$$M_D = a (1 - e^{-bt}) \quad (\text{Eqn. 4})$$

where  $M_D$  is dry mass and  $t$ , is time (hpf).  $AGR$  ( $dM_D/dt$ ) was calculated as the first derivative of Eqn. 4,  $dM_D/dt = (ab)e^{-bt}$ . While %  $SGR$  was calculated as  $dM_{Df}/M_{Di}dt * 100\%$ , where  $dM_{Df}$  is final dry mass, and  $M_{Di}$  is initial dry mass.

## Respirometry

Measurements of changes in  $\dot{M}O_2$  during chronic and acute exposures were made using Loligo microrespirometer system (Loligo Systems, Viborg, Denmark). For each measurement, 3 larvae from one of the 4 rearing conditions were placed in a 2-ml glass respirometer chamber. Each respirometer chamber was placed on a mini magnetic stirrer to allow proper mixing of the water in the chamber. After a 30-minute acclimation period,  $pO_2$  in the chamber was continuously monitored using a fiber-optic  $O_2$  sensor connected to an OXY-4  $O_2$  meter (PreSens, Germany) for up to 1 hour after initiation. Control measurements of  $\dot{M}O_2$  were performed without an animal in the chamber and these blanks were subtracted from every animal's measurement of  $\dot{M}O_2$ .  $pO_2$  was recorded by an automated data acquisition system (Model DAQ-M, Loligo Systems, Denmark), and analyzed using AutoResp Software. Decline of oxygen over time was linear in all assays with larvae with regression  $r^2 > 0.90$ .  $\dot{M}O_2$  was calculated from  $pO_2$  between the start and end of each measurement period.

## Statistical analysis

Two-factor ANOVAs and Bonferroni multiple comparisons tests were used to determine the effects of chronic treatments on growth variables; larval dry mass at hatching ( $M_{Dh}$ ) and final dry mass at the end of the experiment ( $M_{Df}$ ), standard length at hatching ( $L_{Sh}$ ), and final standard length ( $L_{Sf}$ ) as well as yolk utilization rates measured as changes in yolk-sac area ( $Y_A$ ) over time. A significance level of  $P < 0.05$  was used. For metabolic-mass scaling relationships, least-squares regression (LSR) was used because LSR is more appropriate when the  $X$  variable is thought to be influencing the  $Y$  variable, rather than the reverse (Smith 2009), and when  $Y$  is

associated with significantly more measurement error than  $X$ , which is the case for all variables ( $M_D$ ,  $L_S$  and  $Y_A$ ) as well as oxygen consumption rates ( $\dot{M}O_2$ ) (after Glazier 2010, White 2011). Log 10 values were used to normalize the data variation and to produce linear, proportional relationships that could be compared (see Kerhoffer and Enquist, 2009; White 2011; Glazier et al., 2011). ANCOVAs (using body mass as a covariate) determined the significance of differences among  $b$ , scaling exponents (slopes) and  $a$ , coefficients or Y-intercepts (Systat software, Inc, San Jose, CA Version 13) by comparing these parameters using 95% confidence intervals (CI). A mean value outside the 95% CI of another mean value was considered significantly different ( $P < 0.05$ ) (see Smith, 1997). Complete non-overlap of the 95% CI of two means indicated a highly significant ( $P < 0.01$ ) difference (Belia et al., 2005; Cumming 2008).

The log-log scaling slope ( $b$ ) was plotted against two complementary values of metabolic level ( $L$ ): the intercept ( $\log a$ ) of the scaling relationship ( $L_a$ ) and the mass-specific oxygen consumption rate at the midpoint of the scaling relationship ( $L_m$ ) (after Glazier 2009, 2010). Two different values of  $L$  were used because the standard estimate of the elevation of the regression line  $L_a$  may be partially autocorrelated with the slope ( $b$ ). This autocorrelation effect is greatest when the scaling relationships are close and their intercepts are far from the midpoint of the sample body mass range (see Glazier 2009, 2010). Intercepts ( $\log a$ ) at the low end of the body mass range will scale negatively with  $b$ , while intercepts at the upper end will scale positively with  $b$  (Peters 1983; Glazier 2009). Using  $L_m$  as well as  $L_a$  helped address the autocorrelation problem because  $L_m$  is the pivotal midpoint of the regression line and thus independent of the slope ( $b$ ), mathematically (see Glazier 2009). If the relationships of  $L_a$  and  $L_m$  with  $b$  are similar then the effect of  $L$  on  $b$  is likely to be biologically significant and not just a mathematical or statistical artifact (see also Results and Discussion of Glazier 2009 and the present study).

All scaling analyses were based on sample sizes of metabolic rates ( $n > 15$ ) and growth ( $n > 20$ ), reducing the possibility that treatment differences were due to measurement error, given the short total time experimental period (48-168 hpf). All values are shown as mean  $\pm$  95% C.I.

## RESULTS

### Effects of chronic high temperature and hypoxia on yolk-sac larval growth.

Temperature had a significant effect on dry mass at hatching ( $M_{Dh}$ ), which in the high-temperature (T31O21) treatment resulted an 11% increase in dry mass and a 9% increase in

standard length ( $M_{Dh}$ ,  $L_{Sh}$ ,  $F_{3,52} = 9.16$ ,  $P < 0.05$ ,  $F_{3,52} = 9.16$ ,  $P < 0.05$ ) compared to control treatments (T28O21), while  $pO_2$  had no effect ( $P > 0.05$ ) and there was no interactions between temperature and  $pO_2$  (Table 2, Table S1). From hatching to the end of yolk-sac stage (168 hpf)  $M_D$  and standard length ( $L_S$ ) increased in a hyperbolic pattern in all treatments ( $P < 0.0001$ ) (Fig. 1 a, b). Peak growth rates occurred in all treatments at 72 hpf (Table 2, Fig 1a). High-temperature reduced growth rates ( $AGR$  and  $SGR$ ) by 55-57% at 72 hpf compared to controls, while hypoxia had little effect on growth rates ( $AGR$  and  $SGR$ ), yet when combined with high-temperature exhibited the lowest growth rates among all the treatments (Table 2). The domination of temperature effects on  $M_{Dh}$ ,  $L_{Sh}$  and  $SGR$ , were also evident in the higher combined high-temperature (CHT; T31O11 & T31O21) versus combined low temperatures (CLT; T28O11 & T28O21) values (Table 2). At the end of the experiment (168 hpf)  $pO_2$ , not temperature ( $P > 0.05$ ), had a significant effect on final dry mass ( $M_{Df}$ ) ( $F_{3,79} = 10.144$ ,  $P < 0.05$ ) (Table 2), and there was an interaction between temperature and  $pO_2$  ( $F_{3,79} = 5.433$ ,  $P < 0.05$ ) (Table S1), but there was no effect of either temperature or  $pO_2$  on final larval standard length ( $L_{Sf}$ ,  $P > 0.05$ ) (Table S1).

### Effects of chronic high temperature and hypoxia on yolk utilization rate.

At hatching, yolk surface area ( $Y_{Ah}$ ) was significantly different among treatments ( $F_{3,30} = 4.56$ ,  $P < 0.05$ ), with the smallest  $Y_{Ah}$  occurring at high-temperature (31°C) ( $P < 0.05$ ) (Fig. 2, Table S1). For all treatments, yolk surface area ( $Y_A$ ) declined exponentially ( $P < 0.05$ ) from hatching to 168 hpf (Fig. 2), but rates of yolk utilization differed among temperatures ( $F_{3,34} = 8.35$ ,  $P < 0.05$ ). By 96 hpf, only 11% of yolk remained at high-temperature (31°C), compared to 40.8 % at the control temperature (28°C). For hypoxia and high temperature/hypoxia treatments, 38.4%, and 51.9 % yolk remained at 96 hpf, respectively. Overall, the lowest yolk utilization rates occurred in the combined high temperature/hypoxia treatment (T31O11) in which 2.6 % yolk remained at 120 hpf (Fig. 2), while there was no visible yolk in the other treatments.

### Effects of chronic high temperature and hypoxia on routine oxygen consumption rates, mass-specific routine cost of growth, and % net efficiency of growth.

Based on Equations 1 and 2 (see Methods) % net efficiency of growth ( $K_N$ ) was highest at the control temperature of 28°C, when 46% of the total assimilated yolk energy ( $C_y$ , see Equation 1)

was directed to growth (Table 3). At high-temperature,  $K_N$  was reduced compared to controls and only 20.3% was directed to growth, while hypoxia did not appear to be synergistic with high-temperature and had little effect on the  $K_N$  of high-temperature larvae (Table 3). Mean net mass-specific cost of growth ( $C_r$ ) ( $\text{nmol O}_2 \text{ ug}^{-1}$ ) was calculated from Equation 3 (see Methods) for each chronic treatment over the endogenous feeding period of 48 -168 hpf. Chronic exposure to high temperature increased  $C_r$  by 3.8 times compared to control temperature and as a consequence, the final tissue dry mass ( $M_{Df}$ ) that formed more than doubled (2.7x) at the lower temperature. Chronic exposure to hypoxia decreased  $C_r$  by 50% compared to control temperatures, and by 63% combined with high-temperature, correspondingly reducing total tissue ( $M_{Df}$ ) by almost half (56%) and 75% at 28°C and 31°C respectively (Table 3). Thus, hypoxia had less of an effect on  $K_N$  and  $C_r$  at higher temperatures.

### **Effects of chronic high temperature and hypoxia on metabolic-mass scaling relationships.**

Yolk-sac larvae raised under control conditions (T28O21) showed a significant scaling relationship between  $\log M_D$  and  $\dot{M}O_2$ . Relationship of metabolism and mass was negative and had an allometric ( $b < 1$ ) scaling exponent ( $b$ ) of  $0.83 \pm 0.66$  ( $\pm 95\%$  C.I.) and an intercept ( $a$ ) of  $2.11 \pm 0.94$  ( $\pm 95\%$  C.I.)  $\mu\text{mol O}_2 \text{ h}^{-1}$  (Table 4) and was not significantly different from 0.75 or from 1.0 ( $P > 0.05$ ). For all the rest of the chronic treatments (T31O21, T28O11 and T31O11), metabolic scaling slopes ( $b$ ) were not significantly different from zero ( $P > 0.05$ , Table 3) and  $\dot{M}O_2$  was independent of dry mass ( $M_D$ ) (Fig. 3, Table 4).

### **Effects of acute exposure on metabolic-mass scaling relationships in larvae raised under chronic high temperature and hypoxia.**

With the exception of two cases, i.e. high-temperature treated larvae exposed to acute hypoxia, and hypoxia-treated larvae exposed to acute high temperature, metabolic-mass scaling relationships for acute exposures of larvae raised under a combination of chronic high temperature and/or hypoxia, scaling exponents ( $b$ ) were not significantly different from zero (Table 4). For all larvae raised under control conditions and acutely exposed to any one of the following, high temperature, hypoxia, and a combination of high-temperature and hypoxia, metabolic-mass scaling relationships were significant (Table 4, Fig. 4 A-D). When scaling exponents or slopes ( $b$ ) were compared to the control slope of  $(b) = 0.83 \pm 0.68$  ( $b \pm 95\%$  CI),

there were no differences (ANCOVA,  $F_{3,77} = 1.39$ ,  $P = 0.25$ ) (Table 4, Fig. 4A) and the combined  $b$  ( $1.19 \pm 0.25$ ) was different from  $b = 0.69$  and  $0.75$ , but not isometry ( $b = 1.0$ ) (testing for adherence to the “3/4” rule or unity). In addition, scaling exponents of control larvae acutely exposed to high temperature,  $b = 0.81 \pm 0.77$  ( $b \pm 95\%$  CI) or for control larvae acutely exposed to combined high-temperature and hypoxia,  $b = 1.25 \pm 1.08$  ( $b \pm 95\%$  CI), there was no difference from either  $b = 0.75$  or  $b = 1.0$ . But for control larvae acutely exposed to hypoxia the scaling exponent,  $b = 1.88 \pm 1.08$  ( $b \pm 95\%$  CI) was significantly higher than,  $b = 0.75$  but not,  $b = 1.0$ .

In contrast to scaling slopes ( $b$ ), the scaling coefficients ( $a$ ) or Y-intercepts ( $\log a$ ), from all the acute experiments differed when compared to scaling coefficients of larvae raised and tested under control conditions (T28O21),  $\log a = 2.11 \pm 0.97$  ( $a \pm 95\%$  CI) ( $F_{3,77} = 20.84$ ,  $P < 0.0001$ ). There were differences between control larvae and larvae acutely exposed to hypoxia,  $\log a = 3.35 \pm 1.52$  ( $a \pm 95\%$  CI) ( $t = 2.798$ ,  $P < 0.01$ ) and between control larvae and larvae acutely exposed to combined high temperature/hypoxia where  $\log a = 2.60 \pm 1.55$  ( $a \pm 95\%$  CI) ( $t = 2.881$ ,  $P < 0.005$ ). But no difference between larvae acutely exposed to high temperature,  $\log a = 2.17 \pm 1.10$  ( $a \pm 95\%$  CI) (Table 4) and controls ( $P > 0.05$ ).

Finally following Glazier (2008, 2009) and West and West (2013), we plotted scaling exponents ( $b$ ) versus log metabolic level ( $L_a$ ) or allometric coefficients ( $\log a$ ) and included two additional significant scaling relationships from high-temperature larvae acutely exposed to hypoxia and, hypoxic larvae acutely exposed to high-temperature (Table 3), which resulted in significant positive linear relationship ( $r^2 = 0.996$ ,  $P < 0.05$ ) with a mean slope of  $0.73$  and a mean  $\log a$  of  $-0.70$  (Fig. 5A). To test for possible autocorrelation we also plotted the mid-point ( $0.04$  mg) (based on the log dry mass that ranged from  $-1.2$  to  $-1.6$  mg) against  $b$ , which resulted in a negative allometric relationship ( $r^2 = 0.92$ ,  $P < 0.05$ ) with a mean  $b$  of  $-3.53$  and a mean  $L_m$  of  $4.34$  (Fig. 5B). The two additional data points resulted in their own negative relationship (Fig. 5B). Thus, the relationships between  $b$  and  $L$  were not the same when a second estimate of metabolic level is used (i.e. the mid-point or mass-specific metabolic rate of the regression line) and autocorrelation may account for relationship between  $b$  and  $L$ , at least in these experiments.

## DISCUSSION

After hatching and during the first week of life, yolk fuels growth and metabolic activities and larvae act as closed systems with respect to energy input. Results from the present study showed that zebrafish embryos raised from fertilization to the end of the yolk-sac stage (168 hpf) under two stressors (high temperature and hypoxia) experienced imbalances in their energy budgets, because of redirection of yolk energy from growth to metabolic activities in the face of higher metabolic demands of high-temperature. For chronic treatments, while high-temperature resulted in larger ( $M_{Dh}$ ,  $L_{Sh}$ ) larvae at hatch, this size advantage disappeared by the end of the yolk-sac larval period because of reduced specific growth rates ( $SGR$ ), elevated net costs of growth ( $C_r$ ) (by almost 3x compared to controls) and decreased % net growth efficiency (%  $K_N$ ) resulting in lower total mass ( $M_{TD}$ ) at the end of the yolk-sac period. But, a synergistic response was observed as hypoxia suppressed the effects of high-temperature (3°C above controls) on larval metabolism as previously reported for  $Q_{10}$  from our sister study (Pan and Hunt von Herbing, 2017). Therefore, yolk-sac larvae can serve as instructive models for understanding partitioning of limited energy reserves when exposed to multiple stressors (see also Crain et al., 2008; Darling and Côté, 2008; Côté et al., 2016; Tekin et al., 2020).

Imbalances in energy budgets for larvae raised under multiple stressors resulted in disruptions in metabolic scaling, because there were no significant metabolic-mass relationships (i.e. the scaling exponent  $b$  was not significant) in any chronic treatments of high-temperature (i.e. 3°C higher than optimal) and hypoxia treatments. Of the 16 different treatments (with the exception of two treatments, i.e. larvae raised at T31O21 and tested at T28O11, and larvae raised at T28O11 and tested at T31O21, see Table 4), only control larvae (T28O21) showed significant metabolic-mass scaling relationships. Thus, it is likely that yolk-sac larvae may be unable to physiologically adjust or reach energetic stability (allostasis), when raised under conditions other than those considered to be optimal (i.e. T28O21).

We considered that the reason for the large number of insignificant scaling relationships might have been because of the narrow range of body sizes tested ( $M_D$  range = 25.0 - 50.0  $\mu$ g,  $L_S$  range = 2.5 - 4.0 mm). Thus, given that in some of the treatments scaling exponents had low precision (i.e. the confidence intervals often included zero and a range of other values, (e.g. for hypoxic larvae (T28O11) exposed to high-temperature (T31O11),  $b \pm 95\%$  CI =  $-0.11 \pm 0.83$ ; for hypoxic, high-temperature larvae (T31O11) exposed to normoxia (T31O21),  $b \pm 95\%$  CI =  $-0.23$



$\pm 1.56$ ), future work should expand the mass range as well as sample size to improve precision and reduce uncertainty. But while size ranges and sample sizes were small, scaling relationships were still significant and allometric for all control treatments (T28O21), including those in which controls were acutely exposed for 1h in the respirometer to the two stressors. For these acute treatments, it is interesting to note that while scaling exponents ( $b$ ) did not differ among treatments, scaling coefficients ( $\log a$ , or metabolic level ( $L_a$ )) of acute high-temperature/hypoxia treatments ( $2.60 \pm 1.55$ ) were significantly lower than that of hypoxia alone ( $3.35 \pm 1.52$ ), but higher than either high-temperature ( $2.17 \pm 1.10$ ) and controls ( $2.11 \pm 0.97$ ) and provide further support for synergistic or additive interactions. These physiological responses to stressors at the yolk-sac larval stage and the ability for resilience, confirm results from previous studies (Schnurr et al., 2014; Beaman et al., 2016; Best et al., 2018) that the ability to regulate energetic costs through change (allostasis) exists much earlier in development than previously thought. Moreover, some of the plasticity to stressors observed in older fish stages may be inherited from the integration of genomic and epigenetic responses occurring early in development (Schnurr et al., 2014; Beaman et al., 2016; Best et al., 2018).

### **Chronic Effects – Developmental Timing**

Detailed studies of the effects of multiple stressors on developing fish in which morphological and physiological markers change rapidly are difficult to predict because effects of a single variable, such as temperature, on developmental and physiological timing are not linear, as was reported for Atlantic cod (*Gadus morhua*) and haddock (*Melanogrammus aeglefinus*), (Hunt von Herbing et al., 1996; Martell et al., 2005). In the present study for *D. rerio*, embryos and yolk-sac larvae raised from embryos under two stressors (high-temperature and hypoxia) there were no detectable differences in timing of developmental stages at hatch (48 hpf) (see our previous study, Pan and Hunt von Herbing, (2017)) in which staging was based on Nüsslein-Volhard and Dahm, (2002)), or on the morphometric measurements of myotomal height, body surface area, and fin surface area (Pan and Hunt von Herbing, 2017). In an earlier study, Schmidt and Stark (2010) concluded that zebrafish embryos responded with an unexpected flexibility in developmental staging, as well as body mass and standard length, when exposed to multiple abiotic factors (e.g. temperature, oxygen concentration, pH and salinity). The results of Schmidt and Stark (2010) support our results that the observed developmental and physiological plasticity of zebrafish may

be indicative of internal developmental mechanisms, which can foster evolutionary robustness or canalization and can result in resilience in developmental stages (Schmidt and Stark 2010; Waddington, 1942).

### **Chronic Effects - Yolk Utilization and Growth Rates**

The importance of multiple stressors on the timing of developmental and physiological markers as well as on the rates of energy (yolk-sac) utilization is mentioned here because of their implications on the evolution of change in developmental timing, referred to as heterochronic change (Bonner 1988; Kuratani 2009). By exposing embryos and yolk-sac larvae to stressors of high-temperature and hypoxia, developmental modularization may act as a phenotypic buffering mechanism (i.e. conferring resilience) against extreme developmental deviation that has previously been observed as a function of abiotic change (Lukina 1973; Kaushik et al., 1982; Schmidt and Stark 2010; Ho and Burggren 2012; Pan and Hunt von Herbing, 2017). In the present study, yolk-sac larvae raised under control conditions (T28O21) transformed about 45% (%  $K_N$ ) of the energy from yolk into somatic tissue to fuel very high specific growth rates ( $SGR$ ) of 31%  $d^{-1}$  (at 72 hpf). These values are close to the %  $K_N$  of 44% (Kamler, 1992) and  $SGR$  of 25-30%  $d^{-1}$  (Rombough, 2006) recorded for most larvae of oviparous fishes, and typical of the endogenous feeding period in which no energy is lost as feces and active metabolism is low. In *D. rerio*, the mouth and anus do not open until 72 and 144 hpf, respectively (Nüsslein-Volhard and Dahm, 2002) and energy is derived entirely from yolk in the first days after hatching and the effects of stressors on the yolk-utilization rates after hatching can be estimated without considering exogenous feeding. Even after hatching, exogenous feeding is at best inefficient because, in addition to an incomplete digestive tract, more energy is spent in chasing prey than can be gained (Hunt von Herbing et al., 2002). For yolk-sac larvae from embryos raised under chronic conditions of combined high temperature and hypoxia (T31O11) effects of high-temperature dominated after hatching and by 72 hpf, an increase of 3°C above control temperature (28°C) resulted in decreased efficiencies (%  $K_N$ ), faster yolk utilization rates and a 60% decrease in  $SGR$  because of higher growth costs ( $C_r$ ). By the end of yolk-sac stage (168 hpf)  $SGR$  in these yolk-sac larvae was 35% lower than controls. Based on the results from the present study and previous studies, *D. rerio* yolk-sac larvae may be more physiologically plastic in

adjusting to increased metabolic demand (high-temperature) than to decreased metabolic capacity (hypoxia) (see also Pan and Hunt von Herbing, 2017).

While fish yolk-sac larvae grow at much higher rates than juveniles and adults ( $1\text{--}3\% \text{ d}^{-1}$ ) (Houlihan, 1991) larvae have intrinsically smaller aerobic scopes and higher  $C_r$ , resulting in tighter energy budgets compared to older stages. Thus, an increase in metabolic rates such as in response to an increase in temperature would result in a negative energy balance and a reduction in growth rates by the redirection of energy away from growth to metabolic activities to maintain homeostasis or to establish new homeostatic (Glazier, 2005) or allostatic states (Sterling, 2012). In the present study, both *AGR* and *SGR* were 50% lower at high-temperature compared to control temperature and hypoxia. Decreases in growth rates are likely a result of almost equal reductions in net growth efficiency or  $\% K_N$ , especially notable under high-temperature due to elevated metabolic rates. This rebalancing within the energy budget is possible for fish larvae under stress because there is good evidence that fish larvae exhibit compensatory energy allocation (Weiser, 1989; Wieser 1994; Rombough 2006) unlike older stages (juveniles and adults), which operate using additive energy budgets. In compensatory partitioning, total metabolic rate remains constant even though activity levels change, and energetic costs may be met by an increase or decrease of the amount of energy devoted to another activity (Wieser 1994; Rombough, 2006). This energetic rebalancing may only work to a point after which energy budgets will reach an energetic imbalance. In the present study, this imbalance was observed when embryos and larvae, raised under chronic stressor conditions (e.g. high-temperature or hypoxia), exhibited a reduced ability to adjust to further acute exposures, resulting in the breakdown of physiological relationships (see section on metabolic scaling). Energetic imbalances to this extent, or duration, produce unsustainable relationships between growth and metabolism requiring activities making allostasis difficult, if not impossible. Yet, the fact that rapidly developing larvae under multiple chronic stressors can still grow at rates significantly higher than adults, as demonstrated in the present study, is truly remarkable. This suggests that compensatory energy partitioning could underlie some of the reasons for heightened developmental and physiological variation, surprising phenotypic plasticity, and energetic resilience, sometimes observed in early stages (see Pan and Hunt von Herbing, 2017; Pan et al., 2015, 2018, 2021).

## Chronic and Acute Effects - Metabolic Scaling Relationships

Energetic imbalance can also be represented by the non-linear patterns of metabolic scaling exponents ( $b$ ) during ontogenetic shifts (larva to juvenile) when  $b$  shifts from 1.0 to  $< 1.0$ , and in some cases from  $> 1.0$  to  $< 1.0$ , when factors other than growth are responsible (Post and Lee 1996; Bochdansky and Leggett 2001; Glazier 2005). In the present study, control yolk-sac larvae had a mean  $b \pm 95\%$  C.I. of  $0.83 \pm 0.34$  (C.I. = 0.49 - 1.17) and did not differ from the value of  $b = 0.83$  (for larvae up to 40 dpf) reported for this species (Pelster and Burggren, 1996; Bagatto et al., 2001; Barrionuevo and Burggren, 1999; Rombough and Drader, 2009, Lucas et al., 2014). But neither was it significantly different from  $b = 0.75$  (Gillooly et al., 2001, 2007) or from isometry ( $b = 1.0$ ), which is often reported for developing fishes and amphibians (Giguère et al., 1988; Hunt von Herbing, 2006; Moran and Wells, 2007; Mueller et al., 2011) and for pelagic larval invertebrates (Glazier, 2006). In contrast, all log-log metabolic-scaling relationships of zebrafish yolk-sac larvae raised at chronic high-temperature, hypoxia or high-temperature/hypoxia were not significant. While scaling exponents ( $b$ ) might not be helpful for understanding the effects of chronic stressors on metabolic scaling in developing fish, our results agree with predictions of the metabolic-level boundaries hypothesis (MLBH) (Glazier 2005, 2008, 2014, 2020), which holds that temperature may not affect the scaling exponent ( $b$ ). But Glazier (2018) asserts that for early staged ectotherms, “relationships of temperature on ontogenetic metabolic scaling appears to be quite complex”, and therefore some of the variation in temperature and hypoxia (negative, absent, and sometimes even positive), may be a result of small sample sizes and body size ranges (see Glazier 2005, 2020; Pan and Hunt von Herbing, 2017).

Results from the present study agree with predictions of MLBH that while scaling exponents ( $b$ ) did not differ, scaling coefficients ( $\log a$ ) did, and larvae acutely exposed to hypoxia ( $\log a = 3.35 \pm 1.52$ , mean  $\pm$  CI) and high-temperature/hypoxia ( $\log a = 2.61 \pm 1.55$ , mean  $\pm$  CI) had higher values of  $a$  (or  $\log L_a$ ) than controls ( $\log a = 2.11 \pm 0.97$ , mean  $\pm$  CI). While we cannot explain the reason for the differences among the values of  $a$  (or  $\log L_a$ ), one possible source of variation may be that stressors (i.e. hypoxia and high-temperature) have different effects on larval activity and on metabolic costs of activity (Kauffman 1990; Hunt von Herbing et al., 2006). Activity levels have been shown to affect scaling relationships (Glazier 2008, 2010), but were not measured in the present study as they are difficult to quantify in larval fish and we assumed routine activities. Thus for *D. rerio*, the effects of temperature and hypoxia are mixed and the

strong positive isometric metabolic scaling between  $b$  and  $\log L_a$  across two temperatures (28° and 30°C) and two oxygen concentrations (11 and 21 kPa) may be as Glazier (2019) suggested due to high sustained growth and metabolic rates characteristic of larval fish. However, in careful consideration of making general conclusions for scaling, Glazier (2009) states this result may be because of a statistical autocorrelation between  $b$  and  $a$  (or  $L_a$ ) and examination of the relationship between  $b$  and  $L_m$  (i.e. the mid-point or mass-specific metabolic rate of the regression line) is needed.

In our study, autocorrelation is possible as scaling slopes were positive for  $b$  and  $L_a$ , but negative for  $b$  and  $L_m$ . Yet, aside from observations of Gould (1966) and Heusner (1991) it is only relatively recently that the elevation ( $a$ ), or metabolic level ( $L_a$  or  $L_m$ ) of the fitted data in metabolic-mass scaling relationships are considered important due to systemic variation with slope (Glazier 2005, 2008, 2009 a, b; Tan et al., 2019). We suggest that for early life history stages with complex and plastic developmental timing and patterning, it is insufficient to consider only the variation in the exponent  $b$  with size while neglecting the allometry coefficient ( $a$ ) (see West and West (2013). It is clear from current and past work on fish early life stages, as well as for the 179 animal and plant species evaluated in Glazier (2020), that metabolic scaling is plastic and not a result of intrinsic (physical) constraints related to body design (Glazier, 2020; Moyano et al., 2018). Acute or chronic exposure to stressors will be expressed in a stress response whose duration and magnitude is determined by the duration and magnitude of the consequences on the physiology and incurred allostatic load, which in turn will affect energy budgets and influence scaling relationships. Nowhere is this more evident than in rapidly developing and growing, energy limited early life history stages.

## CONCLUSIONS

Using a multifactorial experimental design matrix of temperature (28° and 31°C) and oxygen concentration ( $pO_2$  of 11 and 21 kPa), we determined that the dynamics of the stress response differed between the demand side (i.e. temperature) and supply side (i.e. oxygen concentration) of the energy cascade, with the effects of high-temperature dominating that of hypoxia in *D. rerio* yolk-sac larvae. Differential responses to environmental stressors may result in acceleration of epigenetic strategies enhancing developmental and metabolic plasticity leading to unexpected

resilience and adaptive capacity in fish early life stages. This plasticity may become fixed by genetic assimilation and act as ‘pacemakers’ (see Glazier, 2015) or as epigenetic factors for the evolution of development and function (see Waddington, 1942, 1953; West-Eberhard, 2003) and may be critical for species longevity under long-term environmental change. The occurrence of multiple non-significant scaling relationships when larvae were exposed to chronic high-temperature and hypoxia suggest that fish larvae, with their inherently high development and growth rates, small aerobic scopes and limiting energy supplies may be unable to cope with long-term stress because of cumulative energetic costs (allostatic load), but can to some extent adjust to acute or short-term stress. A need for a different, perhaps novel non-linear or fractional probability allometric approach (see West and West, 2013) may be more suited to quantify how complex adaptive systems (exemplified by rapidly developing fish life stages) may respond to what seem to be stage-specific selective pressures, while at the same time coping with rapid self-organizational, developmental and functional change.

### **Acknowledgements**

We are grateful for help from Drs. Warren Burggren and Jose Mendez-Sanchez for technical assistance with the respirometry and metabolic measurements. We also thank Dr. Doug Glazier for discussion and comments on preparation of the manuscript.

### **Competing interests**

The authors have no competing interests

### **Author contributions**

IHvH and FTCP conceived of the research design. FTCP conducted the experiments. IHvH and FTCP analyzed data and interpreted the results. IHvH and FTCP prepared the figures and tables and IHvH and FTCP edited and revised the manuscript.

### **Funding**

This work was funded by UNT Faculty Grants to IHvH (GP64231).

## References

**Bagatto, B., Pelster, B. and Burggren, W. W.** (2001). Growth and metabolism of larval zebrafish: effects of swim training. *J. Exp. Biol.* **204**, 4335-4343.

**Barrionuevo, W. R. and Burggren, W. W.** (1999). O<sub>2</sub> consumption and heart rate in developing zebrafish (*Danio rerio*): influence of temperature and ambient O<sub>2</sub>. *Am. J. Physiol.* **276**, R505-R513. <https://doi.org/10.1152/ajpregu.1999.276.2.r505>

**Beaman, J. E., White, C. R. and Seebacher, F.** (2016). Evolution of plasticity: mechanistic link between development and reversible acclimation. *Trends Ecol. Evol.* **31**, 237-249. <https://doi.org/10.1016/j.tree.2016.01.004>

**Belia, S., Fidler, F., Williams, J. and Cumming, G.** (2005). Researchers misunderstand confidence intervals and standard error bars. *Psychol. Meth.* **10**, 389–396. <https://doi.org/10.1037/1082-989x.10.4.389>

**Best C. Ikert, H., Kostyniuk D.J., Craig P.M., Navarro-Martin, L., Marandel L., and Mennigen, J.A.** (2018). Epigenetic in teleost fish: From molecular mechanisms to physiological phenotypes. *Comp. Biochem. and Physiol.(B)*. **224**, 210-244. <https://doi.org/10.1016/j.cbpb.2018.01.006>

**Bochdansky, A. B. & Leggett, W. C.** (2001). Winberg revisited : convergence of routine metabolism in larval and juvenile fish. *Can. J. Fish. Aquat. Sci.* **58**, 220–230. <https://doi.org/10.1139/f00-226>

**Bonner, J.T.** (1988) The Evolution of Complexity. Princeton University Press, Princeton, NJ.

**Conceição, L.E.C., van der Meeren, T., Verreth, J.A.J., Evjen, M.S , Houlihan, D.F. and Fyhn, H.J.** (1997). Amino acid metabolism and protein turnover in larval turbot (*Scophthalmus maximus*) fed natural zooplankton or *Artemia*. *Mar. Biol.*,129, 255-265. <https://doi.org/10.1007/s002270050166>



**Cote, I.M., Darling, E.S. and Brown, C.J.** (2016). Interactions among ecosystem stressors and their importance in conservation. *Proc Royal Soc B*, 283, 20152592.  
<https://doi.org/10.1098/rspb.2015.2592>

**Crain, C.M., Kroeker, K. and Halpern, B.S.** (2008). Interactive and cumulative effects of multiple human stressors in marine systems. *Ecol. Lett.* **11**, 1304–1315.  
<https://doi.org/10.1111/j.1461-0248.2008.01253.x>

**Cumming, G.** (2008). Inference by eye: reading the overlap of independent confidence intervals. *Statistics in Medicine* **28**:205–220. <https://doi.org/10.1002/sim.3471>

**Darling, E.S. and Cote, I.M.** (2008). Quantifying the evidence for ecological synergies. *Ecol. Lett.*, **11**, 1278–1286. <https://doi.org/10.1111/j.1461-0248.2008.01243.x>

**Edes, N. A. and Crews, D. E.** (2016). Allostatic load and biological anthropology. *Am. J. Phys. Anthropol.* 162, 44–70. <https://doi.org/10.1002/ajpa.23146>

**Ellis, B.J. and Del Giudice, M.** (2014) Beyond allostatic load: Rethinking the role of stress in regulating human development. *Develop. and Psychopath.* 26, 1–20.  
<https://doi.org/10.1017/s0954579413000849>

**Finn, R. N., Widdows, J. and Fyhn, H. J.** (1995). Calorespirometry of developing embryos and yolk-sac larvae of turbot (*Scophthalmus maximus*). *Mar. Biol.* **122**, 157–163.  
<https://doi.org/10.1007/bf00349289>

**Froese R, and Daniel P.** 2004. FishBase. In: Froese R, Pauly D, editors. World Wide Web Electronic Publication. [www.fishbase.org](http://www.fishbase.org), version (02/2009).  
<https://doi.org/10.1108/err.2000.4.12.151.133>

**Gillooly, J. F., Brown, J. H., West, G. B., Savage, V. M. and Charnov, E. L.** (2001). Effects of size and temperature on metabolic rate. *Science*. **293**, 2248–2251.  
<https://doi.org/10.1126/science.1061967>

**Gillooly, J. F. and Allen, A. P.** (2007). Changes in body temperature influence the scaling of  $\text{VO}_2\text{max}$  and aerobic scope in mammals. *Biology Letters* **3**, 99–102.  
<https://doi.org/10.1098/rsbl.2006.0576>

**Garside, E.T.** (1966). Developmental rate and vertebral number in salmonids  
*J. Fish. Res. Board Can.* **23**, 1537-1551. <https://doi.org/10.1139/f66-143>

**Glazier, D. S.** (2005). Beyond the ‘3/4-power law’: variation in the intra-and interspecific scaling of metabolic rate in animals. *Biol. Rev.* **80**, 611–662.  
<https://doi.org/10.1017/s1464793105006834>

**Glazier, D.S.** (2006). The 3/4-power law is not universal: evolution of isometric, ontogenetic metabolic scaling in pelagic animals. *Bioscience* **56**, 325-332. [https://doi.org/10.1641/0006-3568\(2006\)56\[325:tplinu\]2.0.co;2](https://doi.org/10.1641/0006-3568(2006)56[325:tplinu]2.0.co;2)

**Glazier, D.S.** (2008). Effects of metabolic level on the body size scaling of metabolic rate in birds and mammals. *Proc. Biol. Sci.* **275**, 1405-1410. <https://doi.org/10.1098/rspb.2008.0118>

**Glazier, D.S.** (2009). Activity affects intraspecific body-size scaling of metabolic rate in ectothermic animals. *J. Comp. Physiol B.* **179**, 821-828. <https://doi.org/10.1007/s00360-009-0363-3>

**Glazier, D. S.** (2010). A unifying explanation for diverse metabolic scaling in animals and plants. *Biol. Rev. Camb. Philos. Soc.* **85**, 111-138. <https://doi.org/10.1111/j.1469-185x.2009.00095.x>

**Glazier D.S.** (2014) The scaling of metabolic scaling within physical limits. *Systems* **2**:425–450.  
<https://doi.org/10.3390/systems2040425>

**Glazier, D. S.** (2015). Is metabolic rate a universal ‘pacemaker’ for biological processes? *Biol. Rev.* **90**, 377-407. <https://doi.org/10.1111/brv.12115>

**Glazier, D. S.** (2020). Activity alters how temperature influences intraspecific metabolic scaling: testing the metabolic-level boundaries hypothesis. *J. Comp. Physiol. B Biochem. Syst. Environ. Physiol.* **190**, 445–454. <https://doi.org/10.1007/s00360-020-01279-0>

**Glencross B.D.** (2008). A factorial growth and feed utilization model for barramundi, *Lates calcarifer* based on Australian production conditions. *Aquacult. Nutr.*, **14**, 360-373. <https://doi.org/10.1111/j.1365-2095.2007.00543.x>

**Glencross, B.D. and Bermudes, M.** (2011) The effect of high-water temperatures on the allometric scaling effects of energy and protein starvation losses in juvenile barramundi, *Lates calcarifer*. *Comp. Biochem. Physiol. A* **159**, 167–174. <https://doi.org/10.1016/j.cbpa.2011.02.013>

**Glencross, B. D. and Bermudes, M.** (2012). Adapting bioenergetic factorial modelling to understand the implications of heat stress on barramundi (*Lates calcarifer*) growth, feed utilisation and optimal protein and energy requirements – potential strategies for dealing with climate change? *Aquacult. Nutr.* **18**, 411-422. <https://doi.org/10.1111/j.1365-2095.2011.00913.x>

**Gould, S. J.** (1966). Allometry and size in ontogeny and phylogeny. *Biol. Rev. Camb. Phil. Soc.* **41**, 587–640. <https://doi.org/10.1111/j.1469-185x.1966.tb01624.x>

**Giguère, L. A., Côte, B. and St-Pierre, J.-F.** (1988). Metabolic rates scale isometrically in larval fishes. *Mar. Ecol. Prog. Ser.* **50**, 13–19. <https://doi.org/10.3354/meps050013>

**Hamor, T. and Garside, E. T.** (1976). Developmental rates of embryos of Atlantic salmon, *Salmo salar* L., in response to various levels of temperature, dissolved oxygen, and water exchange. *Can. J. Zool.* **54**, 1912– 1917. <https://doi.org/10.1139/z76-221>

**Hemmingsen, A.M.** (1960). Energy metabolism as related to body size and respiratory surfaces and its evolution. *Rep. Steno Mem. Hosp. Nord. Insul. Lab.* **9**, 1-110.

**Heusner, A. A.** (1991b). Size and power in mammals. *J. Exp. Biol.* **160**, 25–54.

<https://doi.org/10.1152/jappl.1983.54.4.867>

**Ho, D. H. and Burggren, W. W.** (2012). Parental hypoxic exposure confers offspring hypoxia resistance in zebrafish (*Danio rerio*). *J. Exp. Biol.* **215**, 4208–4216.

<https://doi.org/10.1242/jeb.074781>

**Houlihan, D.R.** (1991). Protein turnover in ectotherms and implications for energetics. In *Advances in Comparative and Environmental Biology* (ed. R. Giles, R.), pp. 1–43. Springer-Verlag, Berlin. [https://doi.org/10.1007/978-3-642-75897-3\\_1](https://doi.org/10.1007/978-3-642-75897-3_1)

**Hunt von Herbing, I.** (2006). The physiological basis for metabolic scaling in animals: a developing perspective. In *Comparative Developmental Physiology* (ed. S. J. Warburton, W. W. Burggren, B. Pelster, C. L. Reiber and Spicer, J.), pp. 83–98. New York: Oxford University Press, Inc. <https://doi.org/10.1016/j.cbpa.2007.06.018>

**Hunt von Herbing, I. and Boutilier, R. G.** (1996). Activity and metabolism of larval Atlantic cod (*Gadus morhua*) from Scotian Shelf and Newfoundland source populations. *Mar. Biol.* **124**, 607–617. <https://doi.org/10.1007/bf00351042>

**IPCC** (2019). An IPCC Special Report on the Ocean and Cryosphere in a Changing Climate (SROCC). [www.ipcc.com](http://www.ipcc.com).

**Kamler, E.** (1992). *Early Life History of Fish: An Energetics Approach*. Chapman & Hall, London. <https://doi.org/10.1038/137780b0>

**Kauffman, R.** (1990). Respiratory cost of swimming in larval and juvenile cyprinids. *J. Exp. Biol.* **150**, 343–366. <https://doi.org/10.1111/j.1439-0426.1986.tb00437.x>

**Kaushik SJ, Dabrowski K, and Luquet P.** (1982). Patterns of nitrogen excretion and oxygen consumption during ontogenesis of common carp (*Cyprinus carpio*). *Can. J. Fish. Aquat. Sci.* **39**, 1095–1105. <https://doi.org/10.1139/f82-147>

**Kerkhoff, A. J., and Enquist, B. J.** (2009). Multiplicative by nature: why logarithmic transformation is necessary in allometry. *J. Theor. Biol.* **257**, 519–521. <https://doi.org/10.1016/j.jtbi.2008.12.026>

**Killen, S. S., Atkinson, D. and Glazier, D. S.** (2010). The intraspecific scaling of metabolic rate with body mass in fishes depends on lifestyle and temperature. *Ecol Lett.* **13**, 184-193. <https://doi.org/10.1111/j.1461-0248.2009.01415.x>

**Kimmel, C. B., Ballard, W. W., Kimmel, S. R., Ullmann, B. and Schilling, T. F.** (1995). Stages of embryonic development of the zebrafish. *Dev.Dyn.* **203**, 253-310. <https://doi.org/10.1002/aja.1002030302>

**Korte, S. M., Olivier, B., and Koolhaas, J. M.** (2007). A new animal welfare concept based on allostasis. *Physiol. Behav.* **92**, 422-428.

**Kuratani, S.** (2009). Modularity, comparative embryology and evo-devo: Developmental dissection of body plans. *Dev. Biol.* **332**, 61-69. <https://doi.org/10.1016/j.physbeh.2006.10.018>

**Kolokotronis, T., Savage, V. M., Deeds, E. J. and Fontana, W.** (2010). Curvature in metabolic scaling. *Nature* **464**, 753-756.

**Leeuwis, R. H. J., Nash, G. W., Sandrelli, R. M., Zanuzzo, F. S. and Gamperl, A. K.** (2019). The environmental tolerances and metabolic physiology of sablefish (*Anoplopoma fimbria*). *Comp. Biochem. Physiol. A Mol. Integr. Physiol.* **231**, 140-148. doi:10.1016/j.cbpa.2019.02.004

**Lucas J., Schouman A., Lyphout L., Cousin X., and Lefrancois C.** (2014). Allometric relationship between body mass and aerobic metabolism in zebrafish *Danio rerio*. *J Fish Biol.* **84**, 1171–1178. <https://doi.org/10.1111/jfb.12306>

**Lukina, O.V.** 1973. Respiratory rate of the North Okhotsk chum salmon (*Oncorhynchus keta* (Walb.)). *J. Ichthyol.* **13**, 425–430.

**Martell, D.J., Kieffer, J.D. and Trippel, E.A.** (2005). Effects of temperature during early life history on embryonic and larval development and growth in haddock. *J. Fish Biol.* **66**: 1558-1575.

**Mauss, D., Jian L., Burkhard S., Angerer, P. and Jarczok, M.N.** (2015). Measuring allostatic load in the workforce: a systematic review. *Ind. Health* **53**, 5-20.  
<https://doi.org/10.2486/indhealth.2014-0122>

**McEwen, B. S. and Stellar E.** (1993). Stress and the individual mechanisms leading to disease. *Arch. Intern. Med.* **153**, 2093-2101. <https://doi.org/10.1001/archinte.153.18.2093>

**McEwen B.S. and Wingfield J.S.** (2003). The concept of allostasis in biology and biomedicine. *Horm. and Behav.* **43**, 2-15. [https://doi.org/10.1016/s0018-506x\(02\)00024-7](https://doi.org/10.1016/s0018-506x(02)00024-7)

**McEwen B.S. and Wingfield, J.C.** (2007). Allostasis and Allostatic Load. In (ed. Fink, G.) *Encyclopedia of Stress*. 2. Academic Press; New York: 2007. p. 135-141.  
[https://doi.org/10.1016/s0018-506x\(02\)00024-7](https://doi.org/10.1016/s0018-506x(02)00024-7)

**Moran, D. and Wells, R. M. G.** (2007). Ontogenetic scaling of fish metabolism in the mouse-to-elephant mass magnitude range. *Comp. Biochem. Physiol. A* **148**, 611-620.  
<https://doi.org/10.1016/j.cbpa.2007.08.006>

**Moyano M., Illing B., Christiansen L., and Peck M.A.** (2018) Linking rates of metabolism and growth in marine fish larvae. *Mar Biol* **165**, 5. <https://doi.org/10.1007/s00227-017-3252-4>

**Mueller, C. A., Joss, J. M. and Seymour, R. S.** (2011). The energy cost of embryonic development in fishes and amphibians, with emphasis on new data from the Australian lungfish, *Neoceratodus forsteri*. *J. Comp. Physiol. B.* **181**, 43-52. <https://doi.org/10.1007/s00360-010-0501-y>

**Nagy, K. A.** (1987). Field metabolic rate and food requirement scaling in mammals and birds. *Ecol. Mono.* **57**, 111–128. <https://doi.org/10.2307/1942620>

**Nagy, K.A.** (2005). Field metabolic rate and body size. *J Exp. Biol.* **208**, 1621–1625. <https://doi.org/10.1242/jeb.01553>

**Norin, T. and Gamperl, A.K.** (2018). Metabolic scaling of individuals vs. populations: Evidence for variation in scaling exponents at different hierarchical levels. *Func. Ecol.* **32**, 379–388. Doi: 10.1111/1365-2435.12996. <https://doi.org/10.1111/1365-2435.12996>

**Nüsslein-Volhard, C. and Dahm, R.** (eds) (2002). Zebrafish: A Practical Approach: Oxford University Press. <https://doi.org/10.1086/382400>

**Oldham, T., Nowak, B., Hvas, M., and Oppedal, F.** (2019). Metabolic and functional impacts of hypoxia vary with size in Atlantic salmon. *Comp. Biochem. and Physiol. A* **230**, 30–38. <https://doi.org/10.1016/j.cbpa.2019.01.012>

**Ogoshia, M., Katoa, K., Takahashia, H. Ikeuchid, T., Abea, T and Sakamotoa, T.** (2012). Growth, energetics and the cortisol-hepatic glucocorticoid receptor axis of medaka (*Oryzias latipes*) in various salinities. *Gen. Comp. Endocrinol.* **178**, 175–179. <https://doi.org/10.1016/j.ygcen.2012.05.001>

**Pan, T.-C. F., Applebaum, S. L. and Manahan, D. T.** (2015). Experimental ocean acidification alters the allocation of metabolic energy. *Proc. Natl. Acad. Sci. U. S. A.* **112**, 4696–4701. <https://doi.org/10.1073/pnas.1416967112>

**Pan, T.-C. F., Applebaum, S. L., Frieder, C. A. and Manahan, D. T.** (2018). Biochemical bases of growth variation during development: A study of protein turnover in pedigreed families of bivalve larvae (*Crassostrea gigas*). *J. Exp. Biol.* **221**, jeb.171967. <https://doi.org/10.1242/jeb.171967>



- Pan, T.-C.F. and Hunt von Herbing, I.** (2017). Metabolic plasticity in development: Synergistic responses to high temperature and hypoxia in zebrafish, *Danio rerio*. *J. Exp. Zool. Part A* **327**:189-199. <https://doi.org/10.1002/jez.2092>
- Pedersen B.H.** (1997) The cost of growth in young fish larvae, a review of new hypotheses. *Aquac.* **155**, 259–269. [https://doi.org/10.1016/s0044-8486\(97\)00127-0](https://doi.org/10.1016/s0044-8486(97)00127-0)
- Pelster, B. and Burggren, W. W.** (1996). Disruption of hemoglobin oxygen transport does not impact oxygen-dependent physiological processes in developing embryos of zebra fish (*Danio rerio*). *Circ. Res.* **79**, 358-362. <https://doi.org/10.1161/01.res.79.2.358>
- Peters, R.H.** (1983). *The ecological significance of body size*. New York, NY: Cambridge University Press. <https://doi.org/10.1002/ajpa.1330660313>
- Post, J. R. and Lee, J. A.** (1996). Metabolic ontogeny of teleost fishes. *Can. J. Fish. Aquat. Sci.* **53**, 910-923. <https://doi.org/10.1139/f95-278>
- Rombough, P. J.** (1988). Respiratory gas exchange, aerobic metabolism and effects of hypoxia during early life. In *Fish Physiology vol. XIA* (ed. W. S. Hoar and D. J. Randall), pp. 59-161. New York: Academic Press, Inc. [https://doi.org/10.1016/s1546-5098\(08\)60199-5](https://doi.org/10.1016/s1546-5098(08)60199-5)
- Rombough, P. J.** (1994). Energy partitioning during fish development: additive or compensatory allocation of energy to support growth? *Functional Ecology* **8**, 178– 186. <https://doi.org/10.2307/2389901>
- Rombough, P. J.** (2006). Developmental costs and the partitioning of metabolic energy. In: *Comparative Developmental Physiology* (eds. Pelster, B., Reiber C., Spicer J., Warburton, S.J., Burggren W.W.). Oxford University Press, New York, NY. <https://doi.org/10.1146/annurev.physiol.67.040403.104223>

**Rombough, P. and Drader, H.** (2009). Hemoglobin enhances oxygen uptake in larval zebrafish (*Danio rerio*) but only under conditions of extreme hypoxia. *J. Exp. Biol.* **212**, 778-784.

<https://doi.org/10.1242/jeb.026575>

**Samaras A., Santo C.E., Papandroulakis N., Mitrizakis N., Pavlidis M., Höglund E., Pelgri T. N. M., Zethof J., Spanings F.A.T., Vindas M.A., Ebbesson L.O.E., Flik G. and Gorissen, M.** (2018) Allostatic load and stress physiology in European seabass (*Dicentrarchus labrax* L.) and gilthead seabream (*Sparus aurata* L.). *Front. Endocrinol.* **9**,1–13.

<https://doi.org/10.3389/fendo.2018.00451>

**Santos, G. A., Schrama, J. W., Mamauag, R. E. P., Rombout, J. H. W.M. & Verreth, J. A. J.** (2010). Chronic stress impairs performance, energy metabolism and welfare indicators in European seabass (*Dicentrarchus labrax*): the combined effects of fishcrowding and water quality deterioration. *Aquaculture* **299**, 73–80. doi: 10.1016/i.aquaculture.2009.11.018

**Savage, V. M., Gillooly, J. F., Woodruff, W. H., West, G. B., Allen, A. P., Enquist, B. J. and Brown, J. H.** (2004). The predominance of quarter-power scaling in biology. *Func. Ecol.* **18**, 257-282. <https://doi.org/10.1111/j.0269-8463.2004.00856.x>

**Schwemmer, T.G., H. Baumann, C.S. Murray, A.I. Molina and J.A. Nye** (2020). Acidification and hypoxia interactively affect metabolism in embryos, but not larvae, of the coastal forage fish *Menidia menidia*. *J. Exp. Biol.* **223**:1-9. doi:10.1242/jeb.228015

**Schmidt K, and Starck J.M.** (2010). Developmental plasticity, modularity, and heterochrony during the phylotypic stage of the zebra fish, *Danio rerio*. *J. Exp. Zool. (Mol. Dev. Ecol.)* **314B**, 166–178. <https://doi.org/10.1002/jez.b.21320>

**Schnurr, M.E., Yin, Y. and Scott, G.R.** (2014). Temperature during embryonic development has persistent effects on metabolic enzymes in the muscle of zebrafish. *J. Exp. Biol.* **217**:1379-1380. <https://doi.org/10.1242/jeb.094037>

**Schreck, C.B. and Tort, L.** (2016). The concept of stress in fish. In: *Fish Physiology- Biology of stress in Fish, Vol. 35* (eds. C.B. Schreck, L. Tort, A.P. Farrell, C. Brauner), San Diego, CA: Academic Press. <https://doi.org/10.1016/b978-0-12-802728-8.00001-1>

**Seibel, B. A.** (2007). On the depth and scale of metabolic rate variation: scaling of oxygen consumption rates and enzymatic activity in the Class Cephalopoda (Mollusca). *Journal of Experimental Biology* **210**, 1–11. <https://doi.org/10.1242/jeb.02588>

**Seymour, R. S., Gienger, C. M., Brien, M. L., Tracy, C. R., Manolis, S. C., Webb, G. J. W. and Christian, K. A.** (2013). Scaling of standard metabolic rate in estuarine crocodiles *Crocodylus porosus*. *J. Comp. Physiol. B* **183**, 491–500.

**Spence, R., Gerlach, G., Lawrence, C., & Smith, C.** (2008). The behaviour and ecology of the zebrafish, *Danio rerio*. *Biol. Rev.* **83**, 13–34.

**Sterling, P.** (2012). Allostasis: A model of predictive regulation. *Physiol. and Behav.* **106**, 5-15. <https://doi.org/10.1016/j.physbeh.2011.06.004>

**Sterling, P. and Eyer, J.** (1988). Allostasis: A new paradigm to explain arousal pathology. In: *Handbook of Life Stress, Cognition and Health* (ed. S. Fisher and J. Reason). New York: John Wiley & Sons. <https://doi.org/10.1002/smi.2460050311>

**Tan H., Hirst A.G., Glazier D.S., and Atkinson D.** (2019) Ecological pressures and the contrasting scaling of metabolism and body shape in coexisting taxa: cephalopods versus teleost fish. *Phil. Trans. R. Soc. B* **374**, 20180543. <http://dx.doi.org/10.1098/rstb.2018.0543>

**Tekin,E., Diamant,E.S., Cruz-Loya, M., Enriquez, V., Singh, N., Savage, V.M. , and Yeh, V.M.P.J.** (2020). Using a newly introduced framework to measure ecological stressor interactions. *Ecol. Lett.*, **23**, 1391-1403. <https://doi.org/10.1111/ele.13533>

**Waddington, C. H.** (1942) Canalization of development and the inheritance of acquired characters. *Nature* **150**, 563–565. <https://doi.org/10.1038/150563a0>

**Waddington, C. H.** (1953) Genetic assimilation of an acquired character. *Evol.* **7**, 118–126. <https://doi.org/10.1111/j.1558-5646.1953.tb00070.x>

**West, G. B., Brown, J. H. and Enquist, B. J.** (1997). A general model for the origin of allometric scaling laws in biology. *Science* **276**, 122–126. <https://doi.org/10.1126/science.276.5309.122>

**West, D. and West, B. J.** (2013). Physiologic Time: A hypothesis. *Physics of Life Reviews* **10**, 210–224. <https://doi.org/10.1016/j.plrev.2013.04.006>

**West-Eberhart, M.** (2003). Developmental plasticity and evolution. Oxford University Press, New York. <https://doi.org/10.1093/oso/9780195122343.001.0001>

**Westerfield, M.** (1994). The Zebrafish book. A guide for the laboratory use of Zebrafish (*Brachydanio rerio*). Eugene, Oregon: University of Oregon Press. [https://doi.org/10.1007/springerreference\\_108796](https://doi.org/10.1007/springerreference_108796)

**White, C. R., Alton, L. A., Bywater, C. L., Lombardi, E. J. and Marshall, D. J.** (2022). Metabolic scaling is the product of life history optimization. *Science* **377**, 834–839. <https://doi.org/10.1126/science.abm7649>

**White, C. R.** (2011). Allometric estimation of metabolic rates in animals. *Comp. Biochem. Physiol., Part A* **158**, 346–357. <https://doi.org/10.1016/j.cbpa.2010.10.004>

**White, C. R., Phillips, N. F. and Seymour, R. S.** (2006). The scaling and temperature dependence of vertebrate metabolism. *Biol. Lett.* **2**, 125–127. <https://doi.org/10.1098/rsbl.2005.0378>

**Wieser, W.** (1989) Energy allocation by addition and by compensation: an old principle revisited. In *Energy Transformations in Cells and Organisms* (eds. W. Wieser and E. Gnaiger), pp. 98–105. Georg Thieme Verlag, Stuttgart. <https://doi.org/10.1002/iroh.19880730411>

**Wieser, W.** (1994). Cost of growth in cells and organisms: general rules and comparative aspects. *Biological Reviews of the Cambridge Philosophical Society* 69, 1–34.  
[https://doi.org/10.1111/j.1469-185x.1994.tb01484.x`](https://doi.org/10.1111/j.1469-185x.1994.tb01484.x)

## Figures and Tables

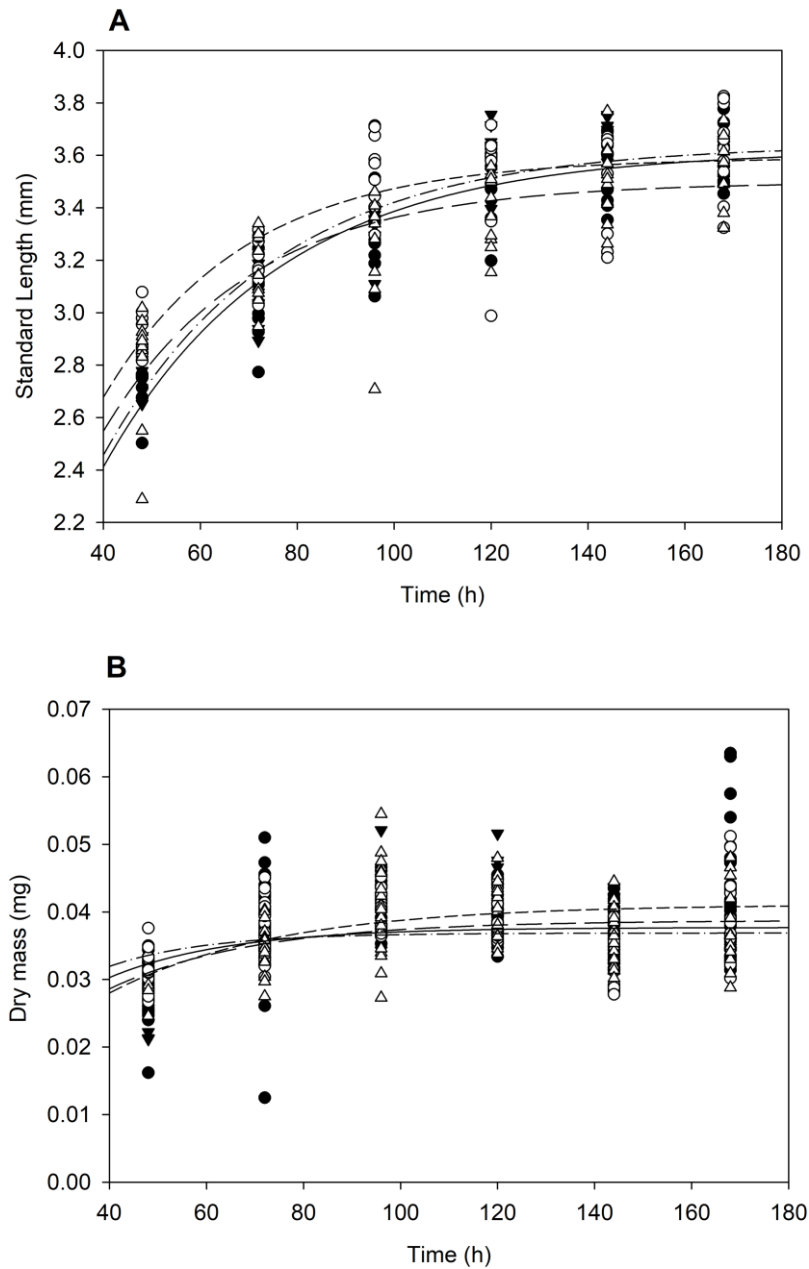

**Fig. 1. Growth for *Danio rerio* yolk-sac larvae raised under chronic conditions.**

Relationships of (A) standard length ( $L_S$ ) (mm) vs hours post-fertilization (hpf) and (B) dry mass ( $M_D$ ) (mg) vs hours post-fertilization (hpf) under four chronic conditions, control (—●, T28O21, 28°C & 21kPa), high-temperature (---○, T31O21, 31°C & 21kPa), hypoxia (- · - ▼, T28O11,

28°C & 11kPa) and high-temperature/hypoxia (—Δ, T31O11, 31°C & 21kPa). Curves were fitted for an exponential rise to maximum:  $M_D = a(1 - e^{-bt})$  where  $M_D$  is dry mass (mg) and  $t$  is time (hpf).



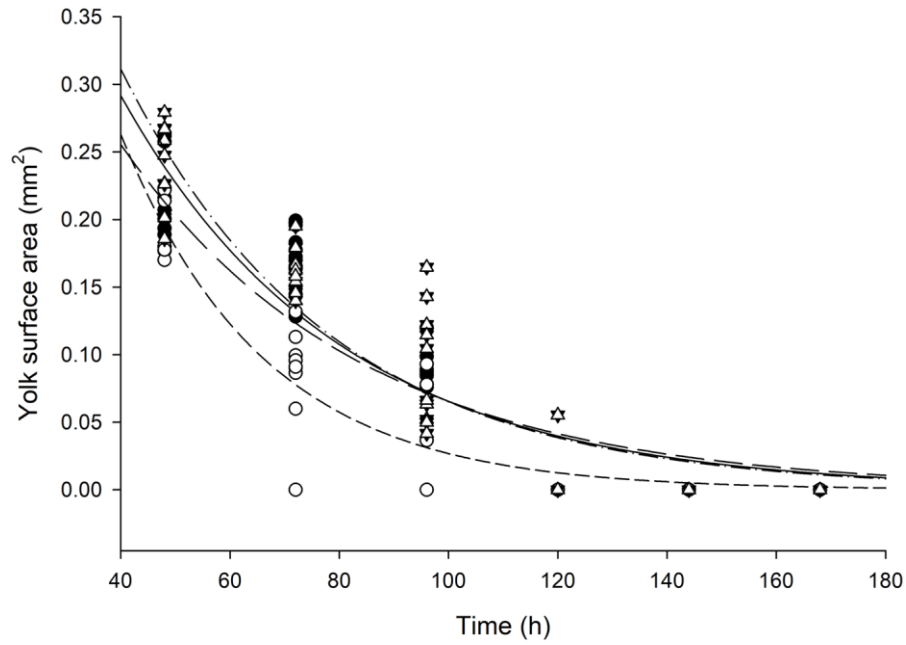

**Fig. 2. Yolk utilization for *Danio rerio* yolk-sac larvae raised under chronic conditions.**

Yolk surface area ( $\text{mm}^2$ ) vs hours post-fertilization (hpf) for *Danio rerio* yolk-sac larvae raised under four chronic conditions, control (— ●, T28O21, 28°C & 21kPa), high-temperature (--- ○, T31O21, 31°C & 21kPa), hypoxia (- · - ▼, T28O11, 28°C & 11kPa) and high-temperature/hypoxia (- - Δ, T31O11, 31°C & 21kPa). Curves are best-fit regressions.

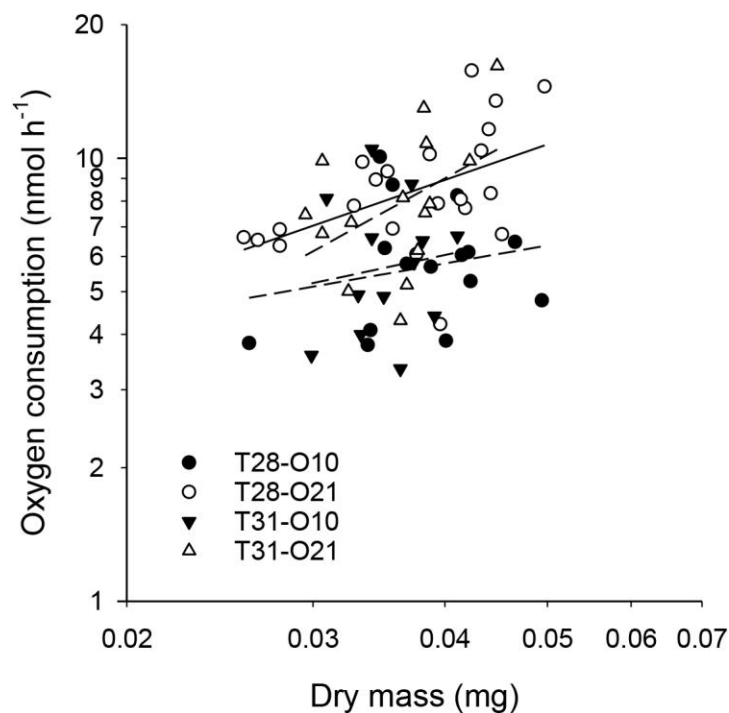

**Fig. 3. Metabolic scaling for *Danio rerio* yolk-sac larvae raised under chronic conditions.**

Regression relationships of metabolic rate plotted as log oxygen consumption ( $\dot{M}O_2$ ) (nmol O<sub>2</sub> h<sup>-1</sup>) and log dry mass ( $M_D$ ) (μg) for *Danio rerio* yolk-sac larvae raised under four chronic conditions, control (—●, T28O21, 28°C & 21kPa), high-temperature (---○, T31O21, 31°C & 21kPa), hypoxia (- · - ▼, T28O11, 28°C & 11kPa) and high-temperature/hypoxia (— — Δ, T31O11, 31°C & 21kPa). Oxygen consumption was measured at environmental condition similar to each chronic conditions. The solid lines represents a significant ( $P < 0.05$ ) scaling relationship of ( $\dot{M}O_2$ ) on ( $M_D$ ) for the chronic control condition of (T28O21). See Table 3 for regression statistics.

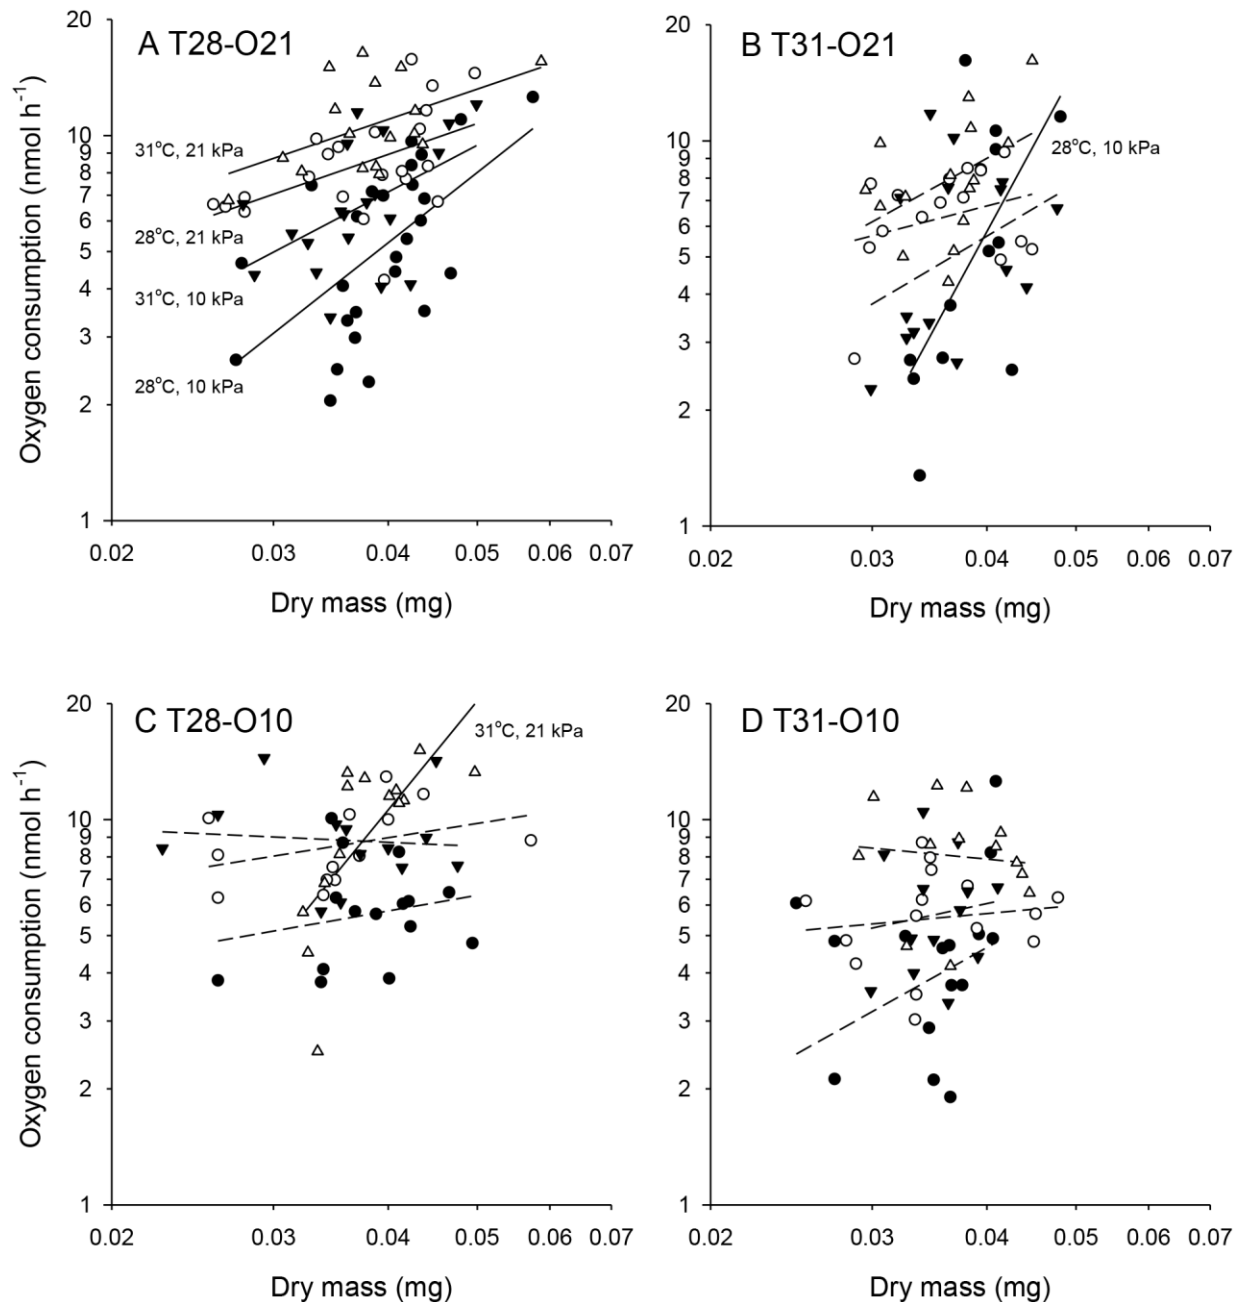

**Fig. 4. Metabolic scaling for *Danio rerio* yolk-sac larvae raised under chronic conditions and then acutely tested.** Regression relationships of metabolic rates plotted as log oxygen consumption ( $\dot{M}O_2$ ) (nmolO<sub>2</sub> h<sup>-1</sup>) and log dry mass ( $M_D$ ) (μg) for *Danio rerio* yolk-sac larvae raised under four different chronic treatments; (A) control (T28O21), (B) high-temperature (T31O21), (C) hypoxia (T28O11), and (D) high-temperature/hypoxia (T31O11) and then acutely exposed under four different stressor combinations for 1h in a respirometer; control (●, acute

exposure to 28°C & 21kPa), high-temperature (O, acute exposure to 31°C & 21kPa), hypoxia (▼, acute exposure to 28°C & 11kPa) and (D) high-temperature/hypoxia (Δ, acute exposure to 31°C & 21kPa). Solid lines represent significant ( $P < 0.05$ ) scaling relationships. See Table 3 for regression statistics.

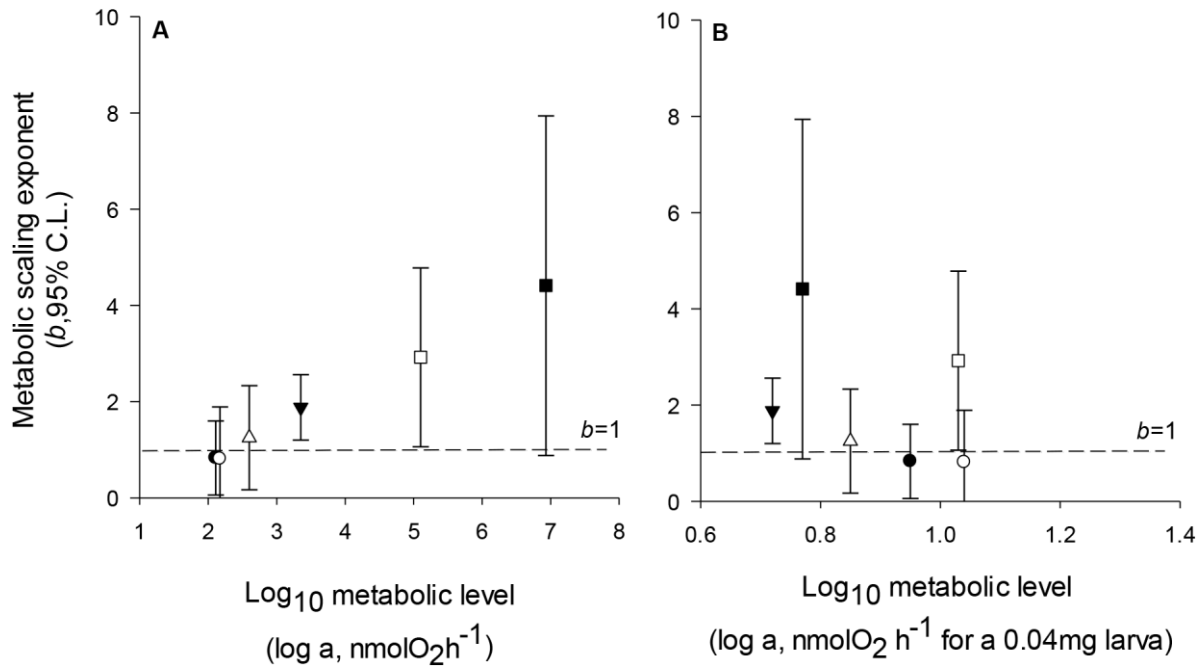

**Fig. 5. Scaling exponents and metabolic level for *Danio rerio* yolk-sac larvae raised under chronic conditions and then acutely tested.** Scaling exponents in relation to routine metabolic level in *Danio rerio* yolk-sac larvae raised under control conditions (T28O21) and acutely tested for 1h in a respirometer under four treatments: control (●, T28O21, 28°C & 21kPa), high-temperature (○, T31O21, 31°C & 21kPa), hypoxia (▼, T28O11, 28°C & 11kPa) and high-temperature/hypoxia (Δ, T31O11, 31°C & 21kPa). Two additional points were added from larvae raised under high-temperature (T31O21 & acutely tested at hypoxia T28O11, ■), and larvae raised in hypoxia (T28O11 & acutely tested at high-temperature T31O21, □). Scaling exponents and metabolic level [estimated as metabolic rate at the intercept (log  $a$ ) in graph A, and at the midpoint of each regression line (0.04 mg) in graph B] are based on all significant log-log least squares regressions (see Fig. 3). Dotted line represents isometric scaling ( $b = 1$ ).

**Table 1. Chronic treatments for *Danio rerio* embryos and yolk-sac larvae.** The four chronic treatments under which embryos and yolk-sac larvae were raised. T28O21 (28°C & 21kPa) (control), T31O21 (31°C & 21kPa) (high-temperature), T28O11 (28°C & 11kPa) (hypoxia), and T31O11 (31°C & 11kPa) high-temperature/hypoxia).

| <b>Chronic Rearing Treatments</b>    | <b>Treatment 1 (T28O21)</b> | <b>Treatment 2 (T31O21)</b> | <b>Treatment 3 (T28O11)</b> | <b>Treatment 4 (T31O11)</b> |
|--------------------------------------|-----------------------------|-----------------------------|-----------------------------|-----------------------------|
| Temperature (°C)                     | 28.0 ± 0.1                  | 28.0 ± 0.2                  | 31.1 ± 0.3                  | 31.0 ± 0.1                  |
| Oxygen Concentration<br>$pO_2$ (kPa) | 21.7 ± 0.4                  | 11.0 ± 0.8                  | 21.8 ± 0.5                  | 11.7 ± 1.0                  |

**Table 2. Growth performance of zebrafish (*Danio rerio*) yolk-sac larvae under four chronic treatments.** T28O21 (28°C & 21kPa) (control), T31O21 (31°C & 21kPa) (high-temperature), T28O11 (28°C & 11kPa) (hypoxia), and T31O11 (31°C & 11kPa) high-temperature/hypoxia).  $M_{Dh}$ , dry mass ( $\mu\text{g}$ ) at hatching (48 hpf),  $M_{Df}$ , dry mass ( $\mu\text{g}$ ) at 168 hpf,  $L_{Sh}$ , standard length at hatching (48hpf),  $L_{Sf}$ , standard length at 168 hpf, Absolute Growth Rate ( $AGR$ ) at 72 hpf ( $\% \text{ d}^{-1}$ ), Specific Growth Rate ( $SGR$ ) at 72 hpf ( $\% \text{ d}^{-1}$ ). \* indicates significant ( $P < 0.05$ ) differences between combined high-temperature (T31O21 & T31O11), low temperature treatments (T28O21 & T28O11).  $^{\dagger}$  indicates significant ( $P < 0.05$ ) differences between combined normoxia (T28O21 & T31O21) and combined hypoxia (T28O11 & T31O11) treatments. Values are means  $\pm$  SE.

| Chronic Treatments |                  |                   |                  |                  |                    |                   |
|--------------------|------------------|-------------------|------------------|------------------|--------------------|-------------------|
| Variable           | T28O21           | T31O21            | T28O11           | T31O11           | Combined High Temp | Combined Low Temp |
| $M_{Dh}$           | 28.4 $\pm$ 0.001 | 31.4 $\pm$ 0.0004 | 26.1 $\pm$ 0.001 | 29.0 $\pm$ 0.002 | 29.9 $\pm$ 0.001*  | 26.8 $\pm$ 0.001* |
| $M_{Df}$           | 38.7 $\pm$ 0.003 | 37.3 $\pm$ 0.002  | 36.0 $\pm$ 0.002 | 37.2 $\pm$ 0.001 | 37.2 $\pm$ 0.001   | 37.4 $\pm$ 0.002  |
| $L_{Sh}$           | 2.72 $\pm$ 0.11  | 3.00 $\pm$ 0.16   | 2.76 $\pm$ 0.07  | 2.91 $\pm$ 0.08  | 2.95 $\pm$ 0.05*   | 2.74 $\pm$ 0.02*  |
| $L_{Sf}$           | 3.61 $\pm$ 0.12  | 3.63 $\pm$ 0.17   | 3.57 $\pm$ 0.07  | 3.55 $\pm$ 0.13  | 3.59 $\pm$ 0.10    | 3.59 $\pm$ 0.15   |
| $AGR$              | 0.13 $\pm$ 0.11  | 0.05 $\pm$ 0.13   | 0.073 $\pm$ 0.12 | 0.03 $\pm$ 0.06  | 0.04 $\pm$ 0.07    | 0.10 $\pm$ 0.07   |
| $SGR$              | 30.6             | 16.9              | 28.2             | 1.2              | 9.1 $\pm$ 5.5*     | 29.4 $\pm$ 0.8*   |



**Table 3. Energetics of *Danio rerio* yolk-sac larvae under four chronic treatments from hatching to the end of the yolk-sac period (48 – 168 hours post fertilization (hpf)).** Mean metabolic rate ( $r\dot{M}O_2$ ,  $\text{nmolO}_2 \text{ h}^{-1} \mu\text{g}^{-1}$ ), mean net cost of growth at routine activity ( $C_r$ ,  $\text{nmolO}_2 \mu\text{g}^{-1}$ ), total dry mass of tissue formed ( $M_{TD}$ ,  $\mu\text{g}$ ), energy equivalent in joules (J) of tissue formed ( $G$ ), cumulative amount of  $O_2$  consumed ( $TO_2$ ,  $\text{nmol O}_2$ ), energy equivalent in joules (J) of  $O_2$  consumed ( $R_r$ ), total energy equivalent in joules (J) ( $G + R_r$ ) and % net growth efficiency (%  $K_N = G/(G + R_r) \times 100\%$ ). Treatments are as follows: T28O21 (28°C & 21kPa) (control), T31O21 (31°C & 21kPa) (high-temperature), T28O11 (28°C & 11kPa) (hypoxia), and T31O11 (31°C & 11kPa) (high-temperature/hypoxia). \* indicates significant ( $P < 0.05$ ) differences between combined high-temperature (CHT, T31O21 & T31O11) and combined low temperature treatments (CLT, T28O21 & T28O11). Values for  $r\dot{M}O_2$  and  $C_r$  are means  $\pm$  SE.

| Chronic Treatments |                 |                   |                 |                 |                          |                         |
|--------------------|-----------------|-------------------|-----------------|-----------------|--------------------------|-------------------------|
| Variable           | T28O21          | T31O21            | T28O11          | T31O11          | Combined High Temp (CHT) | Combined Low Temp (CLT) |
| $r\dot{M}O_2$      | $8.68 \pm 1.1$  | $8.97 \pm 0.92$   | $5.58 \pm 0.54$ | $5.78 \pm 0.57$ | $8.24 \pm 0.55^*$        | $8.08 \pm 0.57^*$       |
| $C_r$              | $45.1 \pm 29.2$ | $170.5 \pm 137.2$ | $22.5 \pm 33.5$ | $16.5 \pm 81.5$ | $93.5 \pm 46.7^*$        | $33.8 \pm 10.8^*$       |
| $M_{TD}$           | 15.76           | 5.87              | 8.81            | 3.99            | $4.9 \pm 0.9^*$          | $12.3 \pm 3.5^*$        |
| $G$                | 0.35            | 0.13              | 0.19            | 0.09            | $0.11 \pm 0.02$          | $0.27 \pm 0.08$         |
| $TO_2$             | 911.50          | 1127.71           | 711.51          | 719.84          | $923.8 \pm 203.9$        | $811.5 \pm 99.9$        |
| $R_r$              | 0.41            | 0.51              | 0.32            | 0.32            | $0.42 \pm 0.09$          | $0.37 \pm 0.05$         |
| $G + R_r$          | 0.76            | 0.64              | 0.51            | 0.41            | $0.53 \pm 0.012$         | $0.64 \pm 0.13$         |
| % $K_N$            | 45.80           | 20.30             | 31.70           | 21.30           | $20.8 \pm 0.5$           | $38.8 \pm 7.05$         |

**Table 4. Metabolic scaling for *D. rerio* yolk-sac larvae raised under chronic treatments.**

Regressions of oxygen consumption rate ( $r\dot{M}O_2$ , nmolO<sub>2</sub> h<sup>-1</sup>) and body mass ( $M_D$ , µg) for yolk-sac larvae raised under four chronic treatments. T28O21 (28°C & 21kPa) (control), T31O21 (31°C & 21kPa) (high-temperature), T28O11 (28°C & 11kPa) (hypoxia), and T31O11 (31°C & 11kPa) high-temperature/hypoxia). Probability values in bold are significant ( $P < 0.05$ ).

| Chronic rearing condition | Acute testing condition |                       | Regression test statistics   |        |                         |        |     |       |              |
|---------------------------|-------------------------|-----------------------|------------------------------|--------|-------------------------|--------|-----|-------|--------------|
|                           | T (°C)                  | PO <sub>2</sub> (kPa) | $\log a \pm 95\% \text{ CI}$ |        | $b \pm 95\% \text{ CI}$ |        | $n$ | $r^2$ | $P$          |
| T28O21                    | 28                      | 21                    | 2.11                         | ± 0.97 | 0.83                    | ± 0.68 | 22  | 0.24  | <b>0.019</b> |
|                           | 31                      | 21                    | 2.17                         | ± 1.10 | 0.81                    | ± 0.77 | 17  | 0.25  | <b>0.041</b> |
|                           | 28                      | 10                    | 3.35                         | ± 1.52 | 1.88                    | ± 1.08 | 26  | 0.35  | <b>0.001</b> |
|                           | 31                      | 10                    | 2.60                         | ± 1.55 | 1.25                    | ± 1.08 | 20  | 0.25  | <b>0.026</b> |
| T31O21                    | 28                      | 21                    | 1.69                         | ± 1.73 | 0.62                    | ± 1.19 | 15  | 0.09  | 0.286        |
|                           | 31                      | 21                    | 2.81                         | ± 2.29 | 1.32                    | ± 1.59 | 15  | 0.20  | 0.095        |
|                           | 28                      | 10                    | 6.93                         | ± 4.99 | 4.41                    | ± 3.53 | 13  | 0.41  | <b>0.019</b> |
|                           | 31                      | 10                    | 2.73                         | ± 3.08 | 1.41                    | ± 2.15 | 15  | 0.13  | 0.180        |
| T28O11                    | 28                      | 21                    | 1.49                         | ± 0.93 | 0.38                    | ± 0.64 | 13  | 0.14  | 0.215        |
|                           | 31                      | 21                    | 5.10                         | ± 2.64 | 2.92                    | ± 1.86 | 14  | 0.49  | <b>0.005</b> |
|                           | 28                      | 10                    | 1.35                         | ± 1.64 | 0.42                    | ± 1.15 | 15  | 0.05  | 0.446        |
|                           | 31                      | 10                    | 0.79                         | ± 1.20 | -0.11                   | ± 0.83 | 13  | 0.01  | 0.779        |
| T31O11                    | 28                      | 21                    | 1.06                         | ± 1.42 | 0.21                    | ± 0.97 | 15  | 0.02  | 0.641        |
|                           | 31                      | 21                    | 0.58                         | ± 2.23 | -0.23                   | ± 1.56 | 13  | 0.01  | 0.756        |
|                           | 28                      | 10                    | 2.53                         | ± 1.62 | 1.34                    | ± 2.38 | 16  | 0.09  | 0.248        |
|                           | 31                      | 10                    | 1.48                         | ± 3.65 | 0.50                    | ± 2.51 | 13  | 0.02  | 0.668        |

**Table S1. Two-way ANOVA results of chronic treatments on growth.** Results from a two-way ANOVA on the effect of chronic temperature ( $^{\circ}\text{C}$ ) and  $p\text{O}_2$  (kPa) treatments on  $M_{Dh}$ , dry mass ( $\mu\text{g}$ ) at hatching (48 hpf),  $M_{Df}$ , dry mass ( $\mu\text{g}$ ) at 168 hpf,  $L_{Sh}$ , standard length at hatching (48hpf),  $L_{Sf}$ , standard length at 168 hpf, Absolute Growth Rate (AGR) at 72 hpf ( $\% \text{ d}^{-1}$ ), Specific Growth Rate (SGR) at 72 hpf ( $\% \text{ d}^{-1}$ ) and  $Y_{Ah}$ , yolk-sac area at hatching (48hpf).

| Response | Source of variation         | df | F      | P                 |
|----------|-----------------------------|----|--------|-------------------|
| $M_{Dh}$ | Temperature                 | 3  | 9.16   | <b>&lt; 0.005</b> |
|          | $p\text{O}_2$               | 3  | 1.622  | > 0.05            |
|          | Temperature x $p\text{O}_2$ | 1  | 0.035  | > 0.05            |
| $M_{Df}$ | Temperature                 | 3  | 0.291  | > 0.05            |
|          | $p\text{O}_2$               | 3  | 10.144 | <b>&lt; 0.005</b> |
|          | Temperature x $p\text{O}_2$ | 1  | 5.433  | > 0.05            |
| $L_{Sh}$ | Temperature                 | 3  | 24.394 | <b>&lt; 0.001</b> |
|          | $p\text{O}_2$               | 3  | 0.462  | > 0.05            |
|          | Temperature x $p\text{O}_2$ | 1  | 1.91   | > 0.05            |
| $L_{Sf}$ | Temperature                 | 3  | 0.015  | > 0.05            |
|          | $p\text{O}_2$               | 3  | 2.348  | > 0.05            |
|          | Temperature x $p\text{O}_2$ | 1  | 0.158  | > 0.05            |
| AGR      | Temperature                 | 3  | 12.306 | <b>&lt; 0.005</b> |
|          | $p\text{O}_2$               | 3  | 0.699  | > 0.05            |
|          | Temperature x $p\text{O}_2$ | 1  | 0.485  | > 0.05            |
| SGR      | Temperature                 | 3  | 12.306 | <b>&lt; 0.005</b> |
|          | $p\text{O}_2$               | 3  | 0.699  | > 0.05            |
|          | Temperature x $p\text{O}_2$ | 1  | 0.485  | > 0.05            |
| $Y_{Ah}$ | Temperature                 | 3  | 12.306 | <b>&lt; 0.005</b> |
|          | $p\text{O}_2$               | 3  | 0.699  | > 0.05            |
|          | Temperature x $p\text{O}_2$ | 1  | 0.485  | > 0.05            |
